# Supplementary material for: Asymmetric reduction of imines with trichlorosilane catalyzed by valine-derived formamide immobilized onto magnetic nano-Fe3O4
Source: Royal Society of Chemistry journal article supplement (doi:10.1039/c5ra08516k), 2015-01-01
Supplement: c5ra08516k1.pdf [file c5ra08516k1.pdf]

**Asymmetric Reduction of Imines with Trichlorosilane  
Catalyzed by Valine-derived Formamide Immobilized onto  
Magnetic Nano-Fe<sub>3</sub>O<sub>4</sub>**

Xin Ge <sup>1,2</sup>, Chao Qian <sup>1</sup>, Xiaoming Ye <sup>1</sup> and Xinzhi Chen\* <sup>1</sup>

<sup>1</sup> Key Laboratory of Biomass Chemical Engineering of Ministry of Education, College of  
Chemical and Biological Engineering, Zhejiang University, P.R China

<sup>2</sup> School of Chemical and Material Engineering, Jiangnan University, P.R China

---

\* Corresponding author. Tel: +86-571-87951615; e-mail: [xzchen@zju.edu.cn](mailto:xzchen@zju.edu.cn)

## General experimental procedure for the preparation of organocatalysts 4

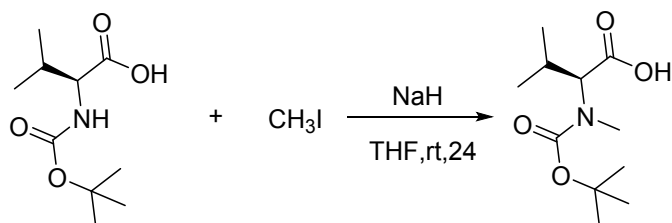

Neat sodium hydride (240mg, 10mmol) was added to a cooled (0 °C) solution of N-BOC-valine (217mg, 1 mmol) and iodomethane (1.42g, 10mmol) in anhydrous THF (20 mL). The reaction mixture was stirred at room temperature for 24 h. Then quenched with water (30 mL). After the reaction mixture was extracted with EtOAc (2\*15 mL), the aqueous solution was acidified to pH 3. It extracted with EtOAc (3\*20 mL). The combined organic phase was dried over MgSO<sub>4</sub> and evaporated to afford the corresponding N-methylated product as a thick colorless oil (230mg, yield 99%). <sup>1</sup>H NMR (400 MHz, CDCl<sub>3</sub>) δ 10.04 (s, 1H), 4.49 – 3.93 (m, 1H), 2.87 (s, 3H), 2.23 (dd, *J* = 16.3, 9.9 Hz, 1H), 1.47 (s, 9H), 1.03 (d, *J* = 6.5 Hz, 3H), 0.92 (d, *J* = 6.7 Hz, 3H).

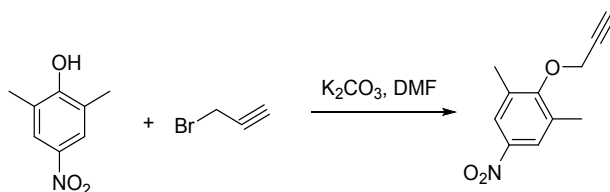

A mixture of phenol (167mg, 1 mmol) and anhydrous potassium carbonate (414 mg, 3 mmol) in dry DMF (15 mL) was heated to 60 °C for half an hour. The mixture was then cooled to room temperature and propargyl bromide (80 wt% toluene solution, 175 g, 1.2 mmol) was added. The mixture was stirred for 4 hours at 60 °C and poured in the ice water with stirring. Stirring continued for 10 minutes, solid separated was filtered and dried under vacuum to afford the desired compound (yield 93%). <sup>1</sup>H NMR (400 MHz, CDCl<sub>3</sub>) δ 7.85 (s, 2H), 4.54 (d, *J* = 2.4 Hz, 2H), 2.46 (t, *J* = 2.3 Hz, 1H), 2.33 (s, 6H).

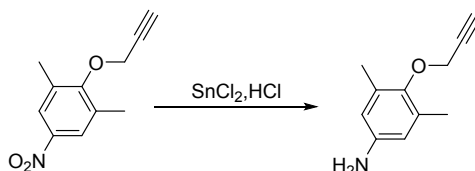

The above solid was dissolved in dioxane (5 mL) and the solution was cooled to 10 °C. A pre-cooled solution of stannous chloride dehydrate (677 mg, 3 mmol) in concentrated HCl (2 mL) was added dropwise and then the reaction mixture was stirred at room temperature for 30 hours. The solution was extracted with EtOAc (30\*3 mL). The organic layer was washed with brine (30 mL), and the combined organic phase was dried over MgSO<sub>4</sub>. The solvent was removed in vacuum, and the product was obtained (yield 87%). <sup>1</sup>H NMR (400 MHz, CDCl<sub>3</sub>) δ 6.33 (s, 2H), 4.41 (d, *J* = 2.3 Hz, 2H), 3.20 (s, 2H), 2.49 (t, *J* = 2.1 Hz, 1H), 2.23 (s, 6H). <sup>13</sup>C NMR (100 MHz, CDCl<sub>3</sub>) δ 147.97,

142.63, 131.81, 115.25, 79.71, 74.72, 60.05, 16.53.

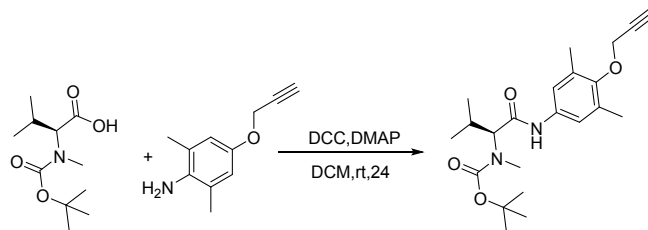

To a stirred solution of amine (175 mg, 1mmol) in  $\text{CH}_2\text{Cl}_2$  (100 mL) was added the (S)-2-(tert-Butoxycarbonyl-methyl-amino)-3-methyl-butanoic acid (231mg, 1 mmol), dicyclohexylcarbodiimide (DCC, 226 mg, 1.1 mmol) and 4-dimethylamino-pyridine (DMAP, 12 mg, 0.1 mmol). The reaction mixture was stirred at room temperature for 24 h. Afterwards the organic phase was filtered and evaporated under reduced pressure to give the crude product, which was purified by column chromatography through silica gel, eluting with 5:1 ethyl acetate/petroleum ether solvent mixture, to give the pure product. Yield 44%, yellow oil.  $^1\text{H}$  NMR (400 MHz,  $\text{CDCl}_3$ )  $\delta$  8.19 (br, 1H), 7.18 (s, 2H), 4.46 (d,  $J = 2.2$  Hz, 2H), 4.12 (d,  $J = 7.1$  Hz, 1H), 2.83 (s, 3H), 2.50 (t,  $J = 2.4$  Hz, 1H), 2.44 – 2.33 (m, 1H), 2.29 (s, 6H), 1.47 (s, 9H), 1.01 (d,  $J = 6.4$  Hz, 3H), 0.91 (d,  $J = 6.6$  Hz, 3H).  $^{13}\text{C}$  NMR (100 MHz,  $\text{CDCl}_3$ )  $\delta$  168.69, 157.41, 151.63, 134.12, 131.78, 120.11, 80.64, 79.26, 75.03, 65.99, 59.90, 30.44, 28.38, 25.98, 19.85, 18.58, 16.63.

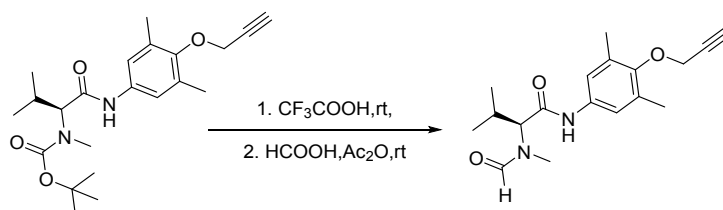

The tert-butyl (S)-methyl(3-methyl-1-oxo-1-((4-(prop-2-yn-1-yloxy)phenyl)amino)butan-2-yl)carbamate (388 mg, 1 mmol) was dissolved in trifluoroacetic acid (2.0 mL) at room temperature. After 1 hour the reaction mixture was evaporated in vacuo, the residue was dissolved in formic acid (0.75 mL) and the resulting solution was cooled to 0 °C. Acetic anhydride (2 mL) was added dropwise and the mixture was allowed to stir at room temperature overnight. The solvent was then removed by reduced pressure. Purification using column chromatography on silica gel with a petroleum ether/ethyl acetate mixture (2:1) afforded the product. Yield 75%, Yellow oil.  $^1\text{H}$  NMR (400 MHz,  $\text{CDCl}_3$ )  $\delta$  8.40 (s, 1H), 8.14 (s, 1H), 7.21 (s, 2H), 4.47-4.41 (m, 3H), 3.02 (s, 3H), 2.50 (t,  $J = 2.2$  Hz, 1H), 2.47 – 2.38 (m, 1H), 2.28 (s, 6H), 1.04 (d,  $J = 6.4$  Hz, 3H), 0.91 (d,  $J = 6.6$  Hz, 3H).  $^{13}\text{C}$  NMR (100 MHz,  $\text{CDCl}_3$ )  $\delta$  167.18, 163.97, 151.84, 133.77, 131.79, 120.38, 79.23, 75.08, 62.97, 59.89, 31.61, 25.44, 19.50, 18.59, 16.63.

## General experimental procedure for the preparation of MNPs-supported organocatalyst **5**

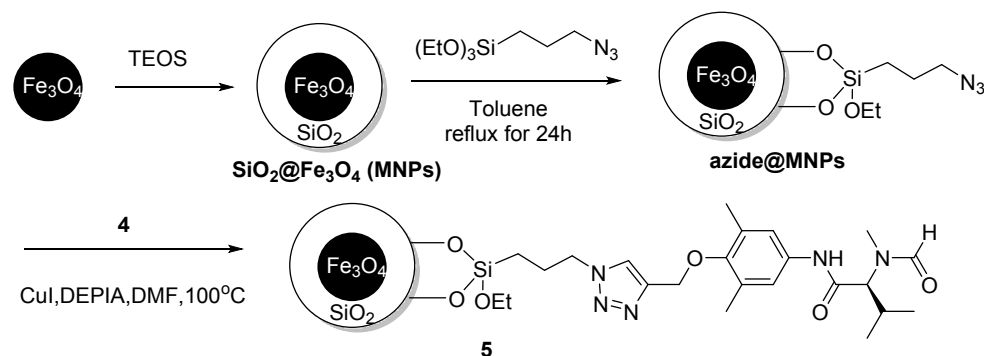

The magnetic nanoparticles ( $\text{Fe}_3\text{O}_4$ ) were prepared by the coprecipitation. To distilled water (125 ml) were added the  $\text{FeCl}_3 \cdot 6\text{H}_2\text{O}$  (5.5 g, 20 mmol) and  $\text{FeCl}_2 \cdot 4\text{H}_2\text{O}$  (2.0 g, 10 mmol). The reaction was maintained at  $85^\circ\text{C}$  under a  $\text{N}_2$  atmosphere. Then, the aqueous ammonia (25wt%, 10 ml) was added rapidly. After 4 h stirring, the reaction was cooled to the room temperature. By the separation of an external magnet, washed with distilled water and dried in the vacuum, the magnetic nanoparticles ( $\text{Fe}_3\text{O}_4$ ) was obtained.

The naked  $\text{Fe}_3\text{O}_4$  (2.0 g) was dispersed in ethanol (120 mL) and water (40 ml) by ultrasonic irradiation. The concentrated  $\text{NH}_3 \cdot \text{H}_2\text{O}$  (6 mL) and TEOS (2 mL) were successively added into the solution, with continuous string for 24 h at room temperature. The MNPs were collected by an external magnet and washed three times with ethanol, followed by drying in vacuum.

The MNPs (0.8 g) was dispersed in dry toluene by ultrasonic irradiation. (3-azidopropyl)triethoxysilane (2.0 g) was added into the solution. The mixture was refluxed for 24 h under a nitrogen atmosphere. The azide@MNPs were collected by an external magnet and washed three times with ethanol, followed by drying in vacuum.

A solution of azide@MNPs (200 mg) and  $\text{CuI}$  (5.0 mg, 0.0255 mmol, 0.1 equiv.) in degassed DMF (5 mL) was stirred under nitrogen. The appropriate alkyne **4** (0.30 mmol, 1.2 equiv.) was then added, following by the addition of *N,N*-Diisopropylethylamine (DIPEA, 0.25 mmol, 32.0 mg, 1.0 equiv.). The solution was stirred at  $100^\circ\text{C}$  under nitrogen, and the reaction was reacted for 12 h. The final product **5** was obtained by by an external magnet and washed three times with ethanol, followed by drying in vacuum. The loading of the catalyst was determined to be 0.24 mmol/g by elemental analysis.

## TG–DTG analysis for azide@MNPs

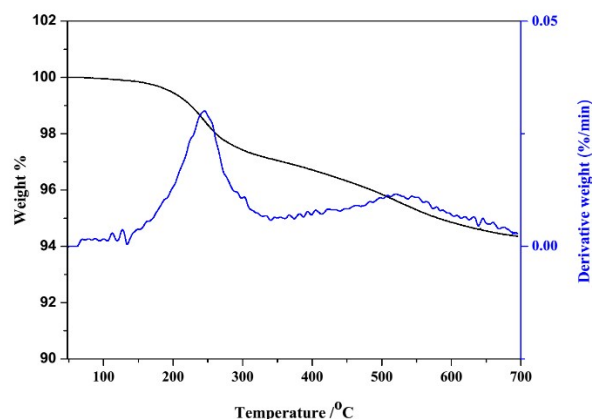

## General experimental procedure for the enantioselective reduction of imines with trichlorosilane catalyzed by catalyst 5

To a stirred solution of imine **6** (0.5 mmol) and catalyst **5** (10 mol %) in toluene (2 mL) was added the trichlorosilane (0.15 ml, 1.5 mmol) at room temperature and the reaction mixture was rocked at room temperature for 24 h. The catalyst was separated from the reaction mixture using an external magnet, washed with ethanol and ethyl acetate, and dried under vacuum, prior to being reused for next runs. Then, saturated NaHCO<sub>3</sub> (2 ml) was added and extracted with ethyl acetate (3\*10 ml). The combined organic phases were washed with brine, dried over MgSO<sub>4</sub>. Afterwards the organic phase was evaporated under reduced pressure to give the crude product, which was purified by column chromatography through silica gel, eluting with 1:99 ethyl acetate/petroleum ether solvent mixture, to give the pure product **7**. The ee value of the reduction product was determined by HPLC on chiral column (Daicel, Chiralpak, OD).

**Table 1.** Recovery of catalyst **5**

| Run | Recovery/% |
|-----|------------|
| 1   | 98         |
| 2   | 99         |
| 3   | 97         |
| 4   | 98         |
| 5   | 97         |

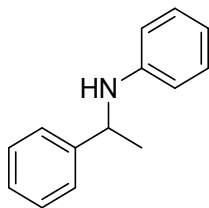

$[\alpha]_D^{20} = +15.4^\circ$  (c=1.05, MeOH), Yellow oil, 94% yield.  $^1\text{H NMR}$  (400 MHz,  $\text{CDCl}_3$ )  $\delta$  7.32 – 7.18 (m, 4H), 7.14 (t,  $J = 7.1$  Hz, 1H), 7.01 (t,  $J = 7.6$  Hz, 2H), 6.56 (t,  $J = 7.2$  Hz, 1H), 6.43 (d,  $J = 7.6$  Hz, 2H), 4.41 (q,  $J = 6.6$  Hz, 1H), 3.92 (br, 1H), 1.43 (d,  $J = 6.7$  Hz, 3H).  $^{13}\text{C NMR}$  (100 MHz,  $\text{CDCl}_3$ )  $\delta$  146.26, 144.20, 128.07, 127.60, 125.83, 124.82, 116.21, 112.29, 52.43, 23.98.

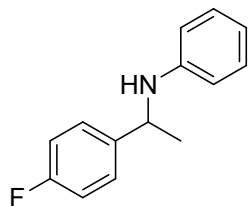

Yellow oil, 95% yield.  $^1\text{H NMR}$  (400 MHz,  $\text{CDCl}_3$ )  $\delta$  7.35 – 7.24 (m, 2H), 7.08 (t,  $J = 7.9$  Hz, 2H), 7.01 – 6.90 (m, 2H), 6.64 (t,  $J = 7.3$  Hz, 1H), 6.47 (d,  $J = 7.9$  Hz, 2H), 4.43 (d,  $J = 6.7$  Hz, 1H), 4.01 (br, 1H), 1.46 (d,  $J = 6.7$  Hz, 3H).  $^{13}\text{C NMR}$  (100 MHz,  $\text{CDCl}_3$ )  $\delta$  161.82 (d,  $J = 244.3$  Hz), 147.13, 140.97, 140.94, 129.22, 127.41 (d,  $J = 8.0$  Hz), 117.54, 115.50 (d,  $J = 21.3$  Hz), 113.44, 52.98, 25.22.

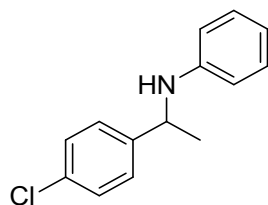

Yellow oil, 97% yield.  $^1\text{H NMR}$  (400 MHz,  $\text{CDCl}_3$ )  $\delta$  7.33 – 7.20 (m, 4H), 7.12 – 7.00 (m, 2H), 6.64 (t,  $J = 7.3$  Hz, 1H), 6.52 – 6.36 (m, 2H), 4.42 (q,  $J = 6.7$  Hz, 1H), 4.01 (br, 1H), 1.45 (d,  $J = 6.7$  Hz, 3H).  $^{13}\text{C NMR}$  (100 MHz,  $\text{CDCl}_3$ )  $\delta$  147.03, 143.90, 132.45, 129.23, 128.87, 127.35, 117.61, 113.43, 53.06, 25.14.

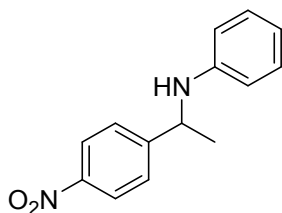

Yellow oil, 94% yield.  $^1\text{H NMR}$  (400 MHz,  $\text{CDCl}_3$ )  $\delta$  8.08 (d,  $J = 8.5$  Hz, 2H), 7.45 (d,  $J = 8.6$  Hz, 2H), 7.01 (t,  $J = 7.7$  Hz, 2H), 6.65 – 6.55 (m, 1H), 6.36 (d,  $J = 8.4$  Hz, 2H), 4.48 (q,  $J = 6.7$  Hz, 1H), 4.02 (s, 1H), 1.45 (d,  $J = 6.8$  Hz, 3H).  $^{13}\text{C NMR}$  (100 MHz,  $\text{CDCl}_3$ )  $\delta$  152.17, 146.02, 145.50, 128.20, 125.68, 123.04, 116.92, 112.27, 52.27, 23.89.

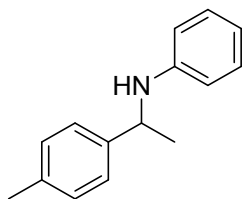

Yellow oil, 72% yield.  $^1\text{H NMR}$  (400 MHz,  $\text{CDCl}_3$ )  $\delta$  7.22 (d,  $J = 8.1$  Hz, 2H), 7.12 – 7.00 (m, 4H), 6.61 (tt,  $J = 7.4, 1.0$  Hz, 1H), 6.51 – 6.44 (m, 2H), 4.42 (q,  $J = 6.7$  Hz, 1H), 3.95

(br, 1H), 2.28 (s, 3H), 1.45 (d,  $J = 6.7$  Hz, 3H).  $^{13}\text{C}$  NMR (100 MHz,  $\text{CDCl}_3$ )  $\delta$  146.26, 141.14, 135.27, 128.13 (d,  $J = 23.1$  Hz), 124.69, 116.09, 112.24, 52.05, 23.92, 19.99.

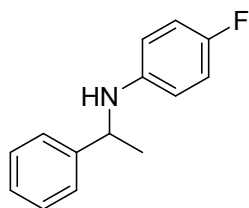

Yellow oil, 94% yield.  $^1\text{H}$  NMR (400 MHz,  $\text{CDCl}_3$ )  $\delta$  7.28 – 7.19 (m, 4H), 7.17 – 7.10 (m, 1H), 6.76 – 6.65 (m, 2H), 6.39 – 6.27 (m, 2H), 4.36 – 4.27 (m, 1H), 3.83 (br, 1H), 1.41 (d,  $J = 6.7$  Hz, 3H).  $^{13}\text{C}$  NMR (100 MHz,  $\text{CDCl}_3$ )  $\delta$  154.63 (d,  $J = 234.7$  Hz), 144.01, 142.59, 127.64, 125.92, 124.78, 114.46 (d,  $J = 22.2$  Hz), 113.06 (d,  $J = 7.3$  Hz), 113.02, 53.03, 24.03.

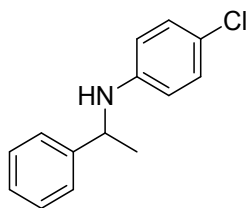

Yellow oil, 93% yield.  $^1\text{H}$  NMR (400 MHz,  $\text{CDCl}_3$ )  $\delta$  7.28 – 7.19 (m, 4H), 7.19 – 7.11 (m, 1H), 6.99 – 6.88 (m, 2H), 6.39 – 6.29 (m, 2H), 4.35 (q,  $J = 6.7$  Hz, 1H), 4.01 (br, 1H), 1.42 (d,  $J = 6.7$  Hz, 3H).  $^{13}\text{C}$  NMR (100 MHz,  $\text{CDCl}_3$ )  $\delta$  144.57, 143.53, 127.79 (d,  $J = 19.7$  Hz), 126.03, 124.77, 120.96, 113.50, 52.70, 23.86.

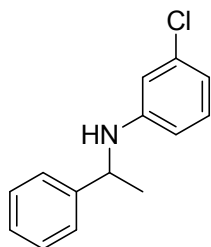

Yellow oil, 84% yield.  $^1\text{H}$  NMR (400 MHz,  $\text{CDCl}_3$ )  $\delta$  7.28 – 7.19 (m, 4H), 7.18 – 7.10 (m, 1H), 6.88 (t,  $J = 8.0$  Hz, 1H), 6.51 (ddd,  $J = 7.9, 1.9, 0.8$  Hz, 1H), 6.40 (t,  $J = 2.1$  Hz, 1H), 6.27 (ddd,  $J = 8.2, 2.3, 0.8$  Hz, 1H), 4.36 (q,  $J = 6.7$  Hz, 1H), 4.04 (br, 1H), 1.41 (d,  $J = 6.7$  Hz, 3H).  $^{13}\text{C}$  NMR (100 MHz,  $\text{CDCl}_3$ )  $\delta$  148.41, 144.57, 134.83, 130.13, 128.80, 127.14, 125.81, 117.17, 113.10, 111.52, 53.38, 24.89.

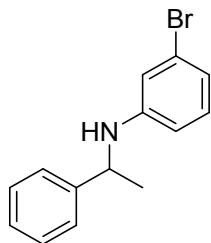

Yellow oil, 92% yield.  $^1\text{H}$  NMR (400 MHz,  $\text{CDCl}_3$ )  $\delta$  7.29 – 7.19 (m, 4H), 7.19 – 7.10 (m, 1H), 6.83 (t,  $J = 8.0$  Hz, 1H), 6.65 (dddd,  $J = 8.3, 6.4, 2.5, 1.3$  Hz, 1H), 6.58 (t,  $J = 2.1$  Hz, 1H), 6.34 – 6.27 (m, 1H), 4.43 – 4.28 (m, 1H), 4.04 (br, 1H), 1.42 (t,  $J = 5.9$  Hz, 3H).  $^{13}\text{C}$  NMR (100 MHz,  $\text{CDCl}_3$ )  $\delta$  147.43, 143.40, 129.34, 127.71, 126.06, 124.72, 122.01, 119.01, 114.97, 110.79, 52.28, 23.76.

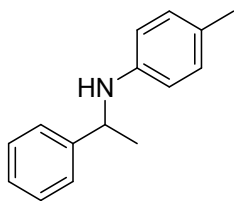

Yellow oil, 81% yield.  $^1\text{H}$  NMR (400 MHz,  $\text{CDCl}_3$ )  $\delta$  7.30 – 7.16 (m, 4H), 7.15 – 7.08 (m, 1H), 6.80 (d,  $J = 8.1$  Hz, 2H), 6.37 – 6.28 (m, 2H), 4.35 (q,  $J = 6.7$  Hz, 1H), 3.77 (br, 1H), 2.09 (s, 3H), 1.39 (d,  $J = 6.7$  Hz, 3H).  $^{13}\text{C}$  NMR (100 MHz,  $\text{CDCl}_3$ )  $\delta$  144.37, 143.97, 128.54, 127.55, 125.73, 125.27, 124.80, 112.38, 52.61, 23.98, 19.30.

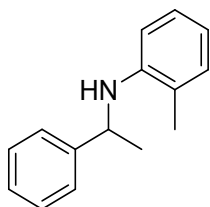

Yellow oil, 67% yield.  $^1\text{H}$  NMR (400 MHz,  $\text{CDCl}_3$ )  $\delta$  7.27 (dd,  $J = 8.2, 1.2$  Hz, 2H), 7.24 – 7.18 (m, 2H), 7.12 (ddd,  $J = 12.1, 6.4, 3.2$  Hz, 1H), 6.95 (d,  $J = 7.3$  Hz, 1H), 6.90 – 6.81 (m, 1H), 6.51 (td,  $J = 7.4, 0.9$  Hz, 1H), 6.28 (d,  $J = 7.9$  Hz, 1H), 4.44 (q,  $J = 6.7$  Hz, 1H), 3.75 (br, 1H), 2.13 (s, 3H), 1.46 (d,  $J = 6.7$  Hz, 3H).  $^{13}\text{C}$  NMR (100 MHz,  $\text{CDCl}_3$ )  $\delta$  144.17 (d,  $J = 12.5$  Hz), 128.92, 127.59, 125.87 (d,  $J = 15.1$  Hz), 124.73, 120.49, 115.79, 109.99, 52.25, 24.20, 16.57.



# NMR spectra of organocatalysts

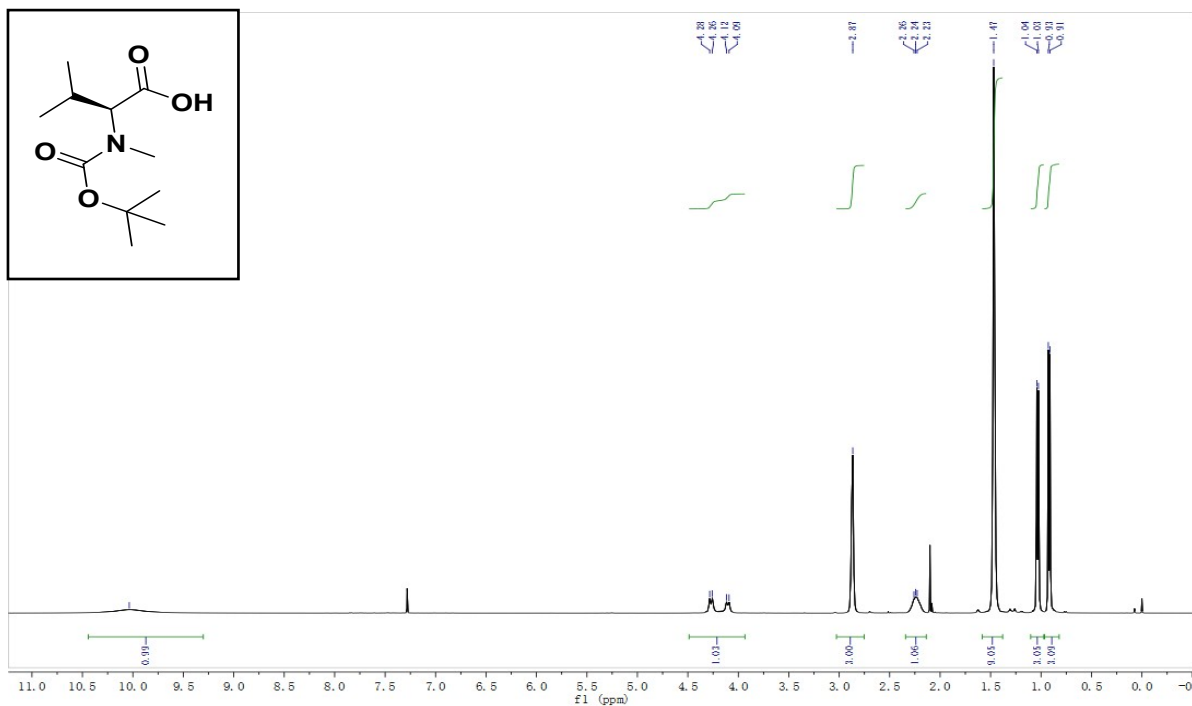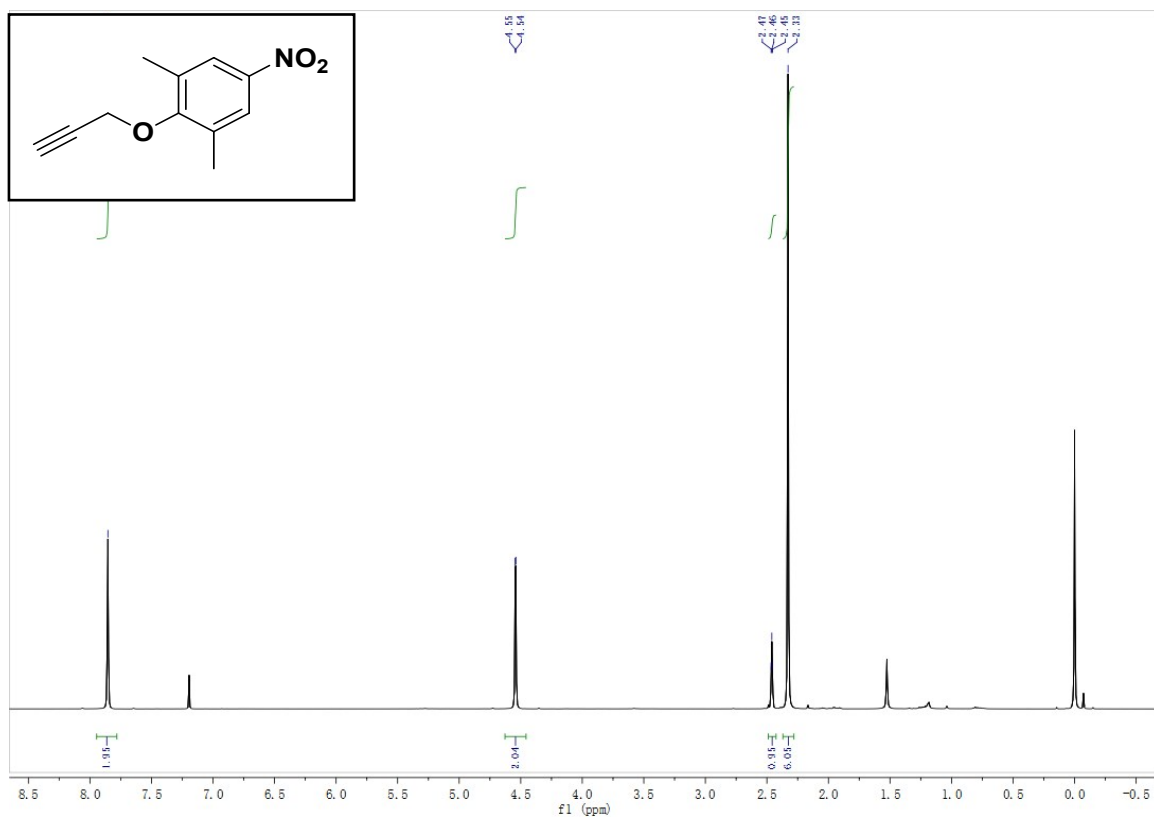

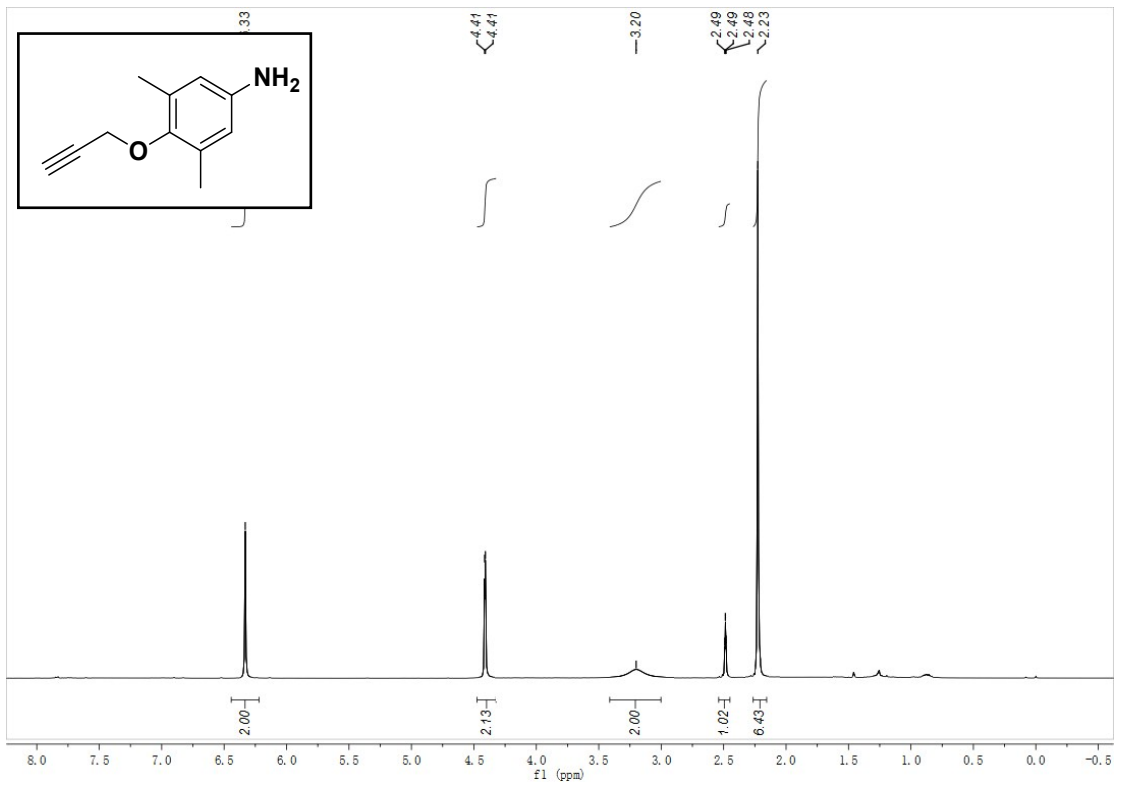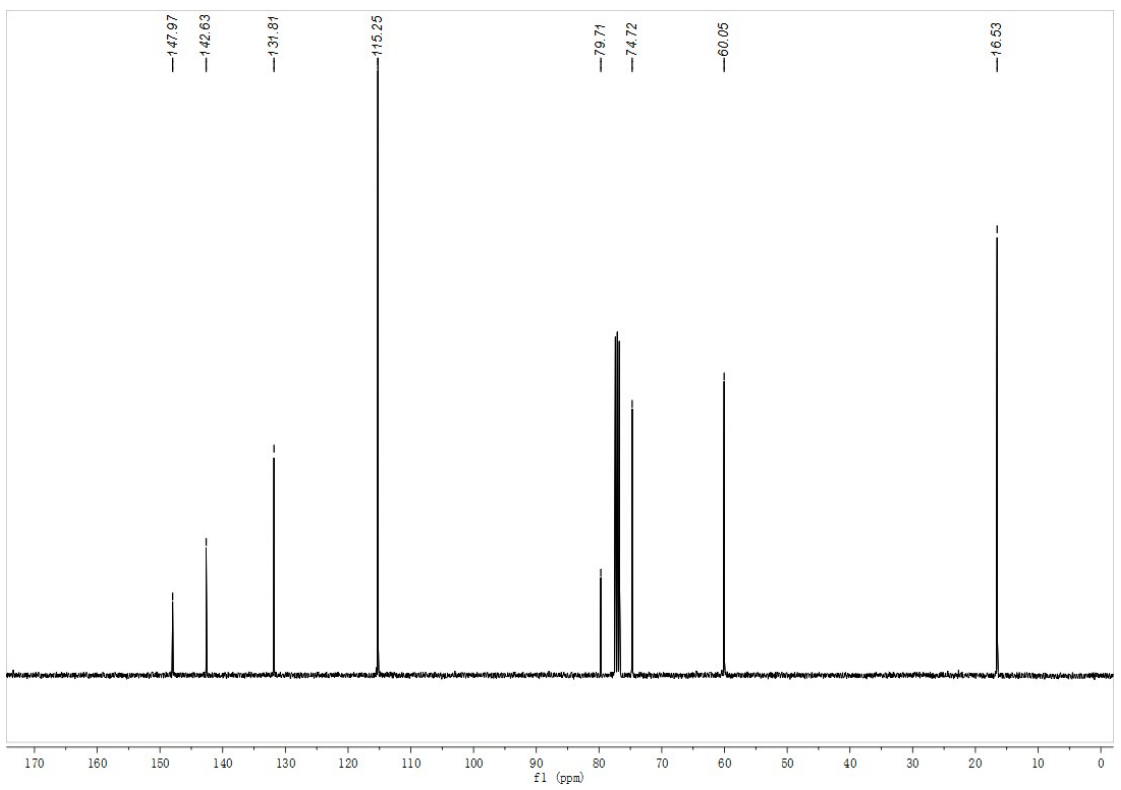

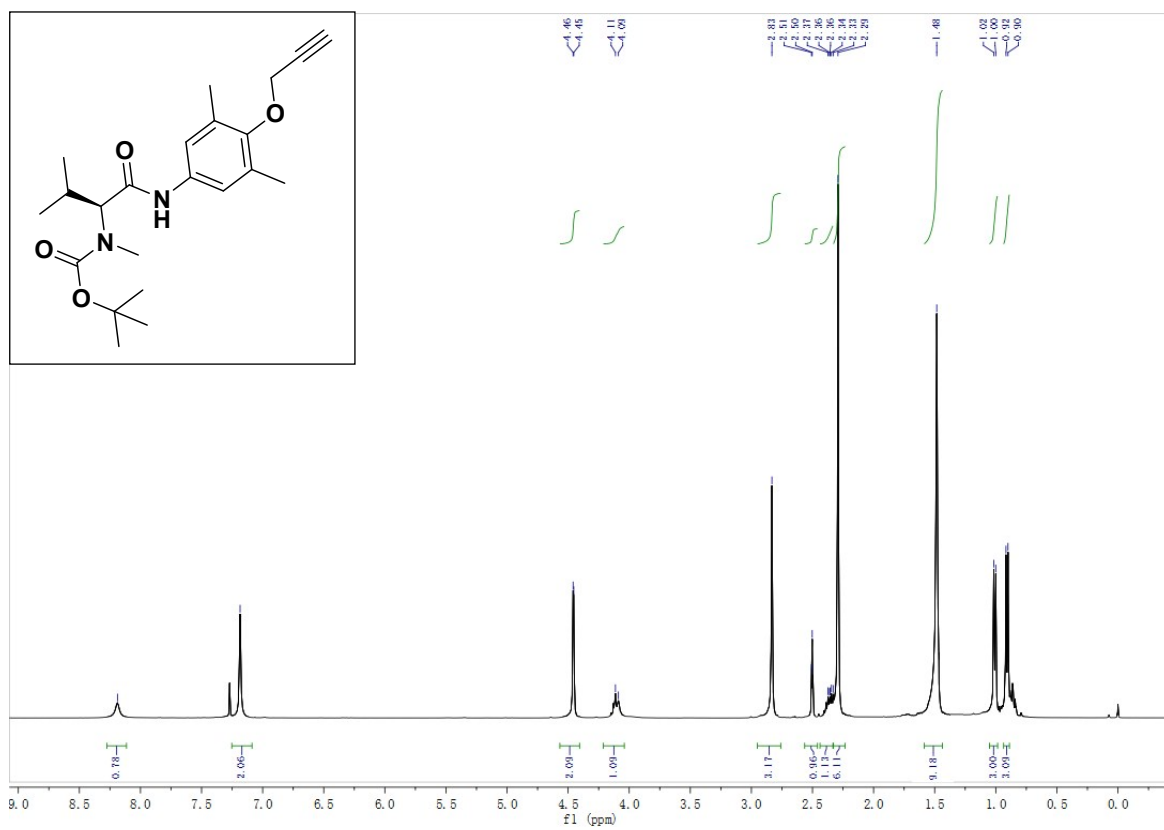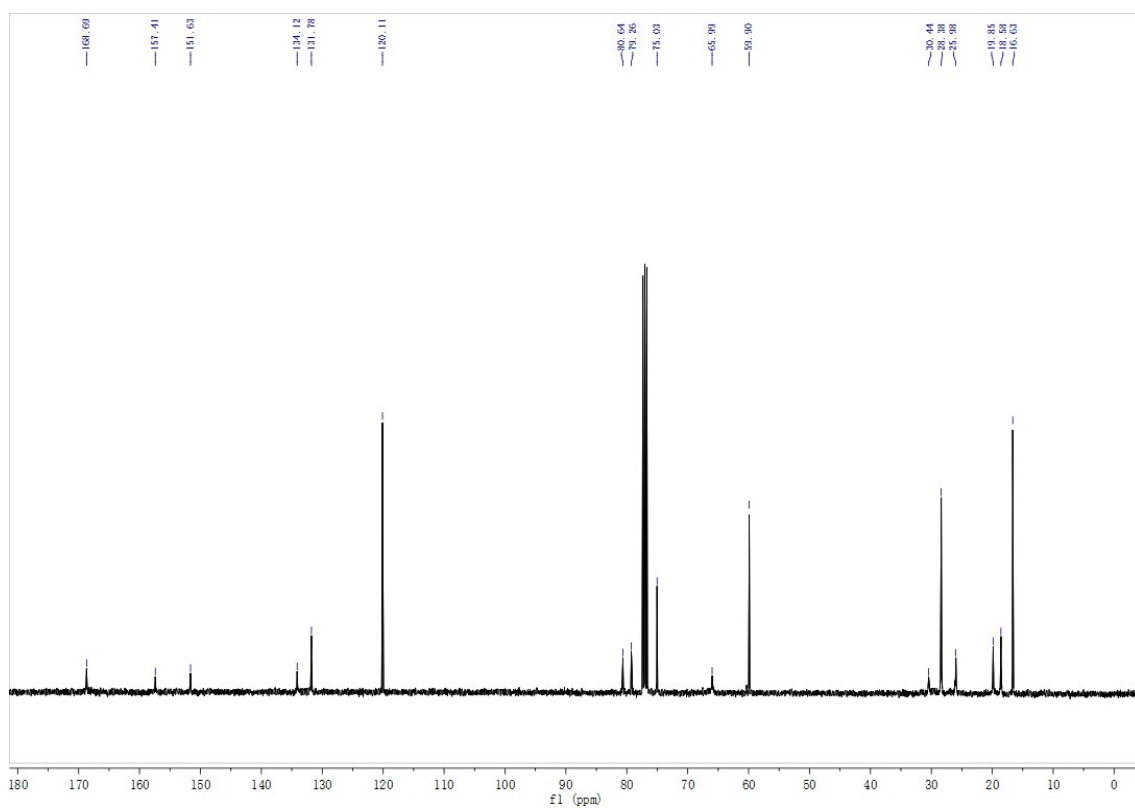

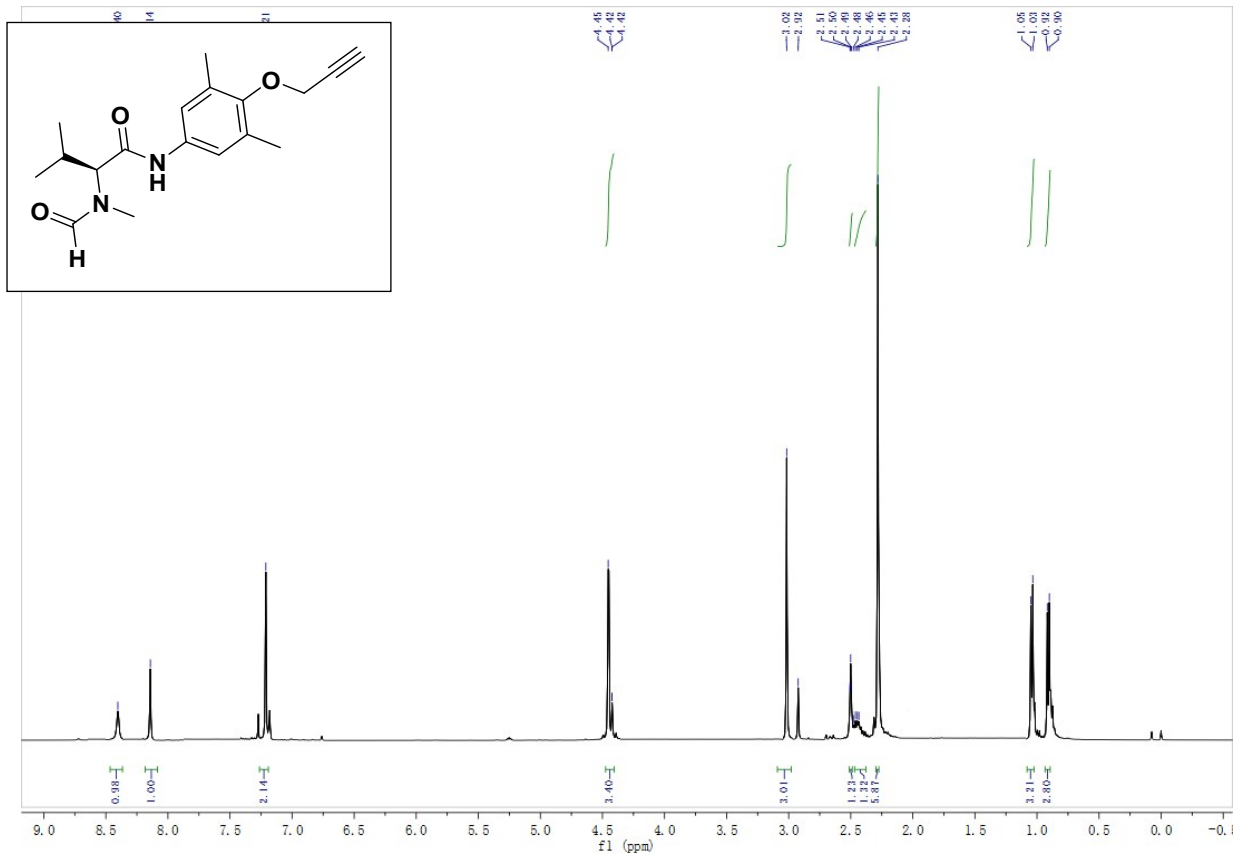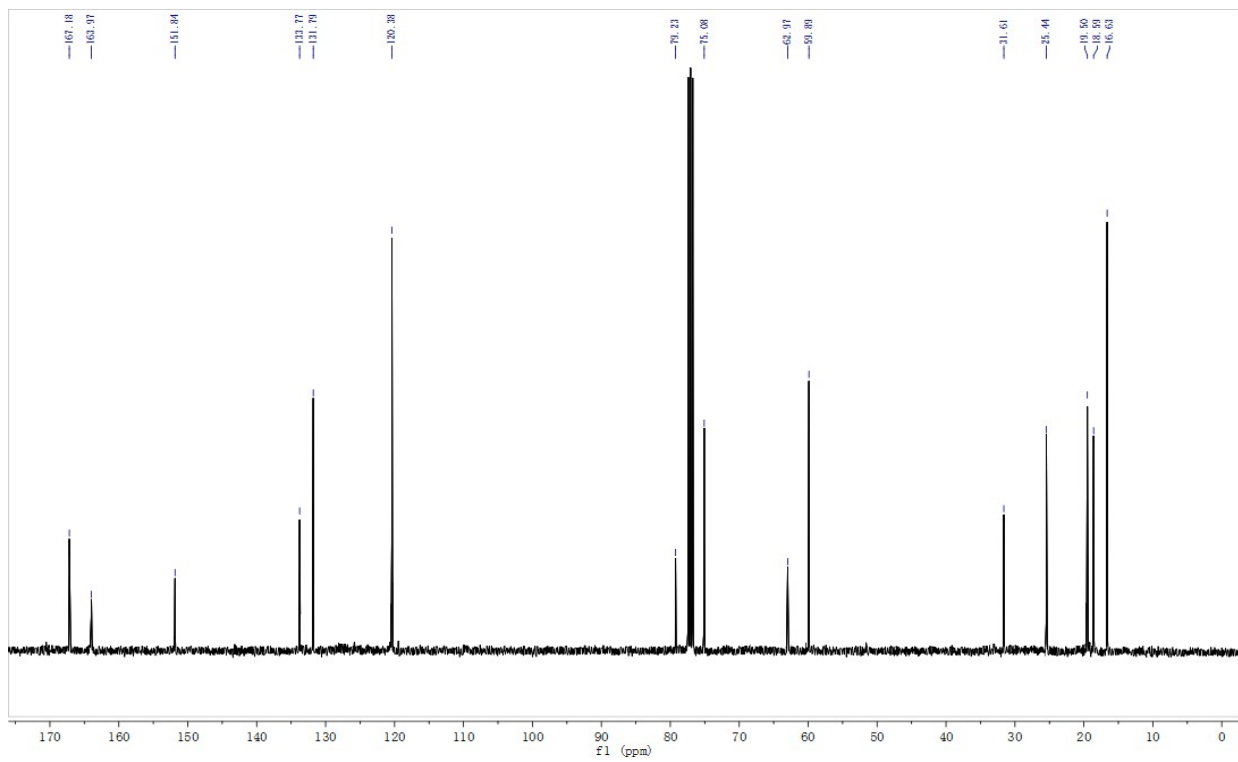

# NMR spectra of products

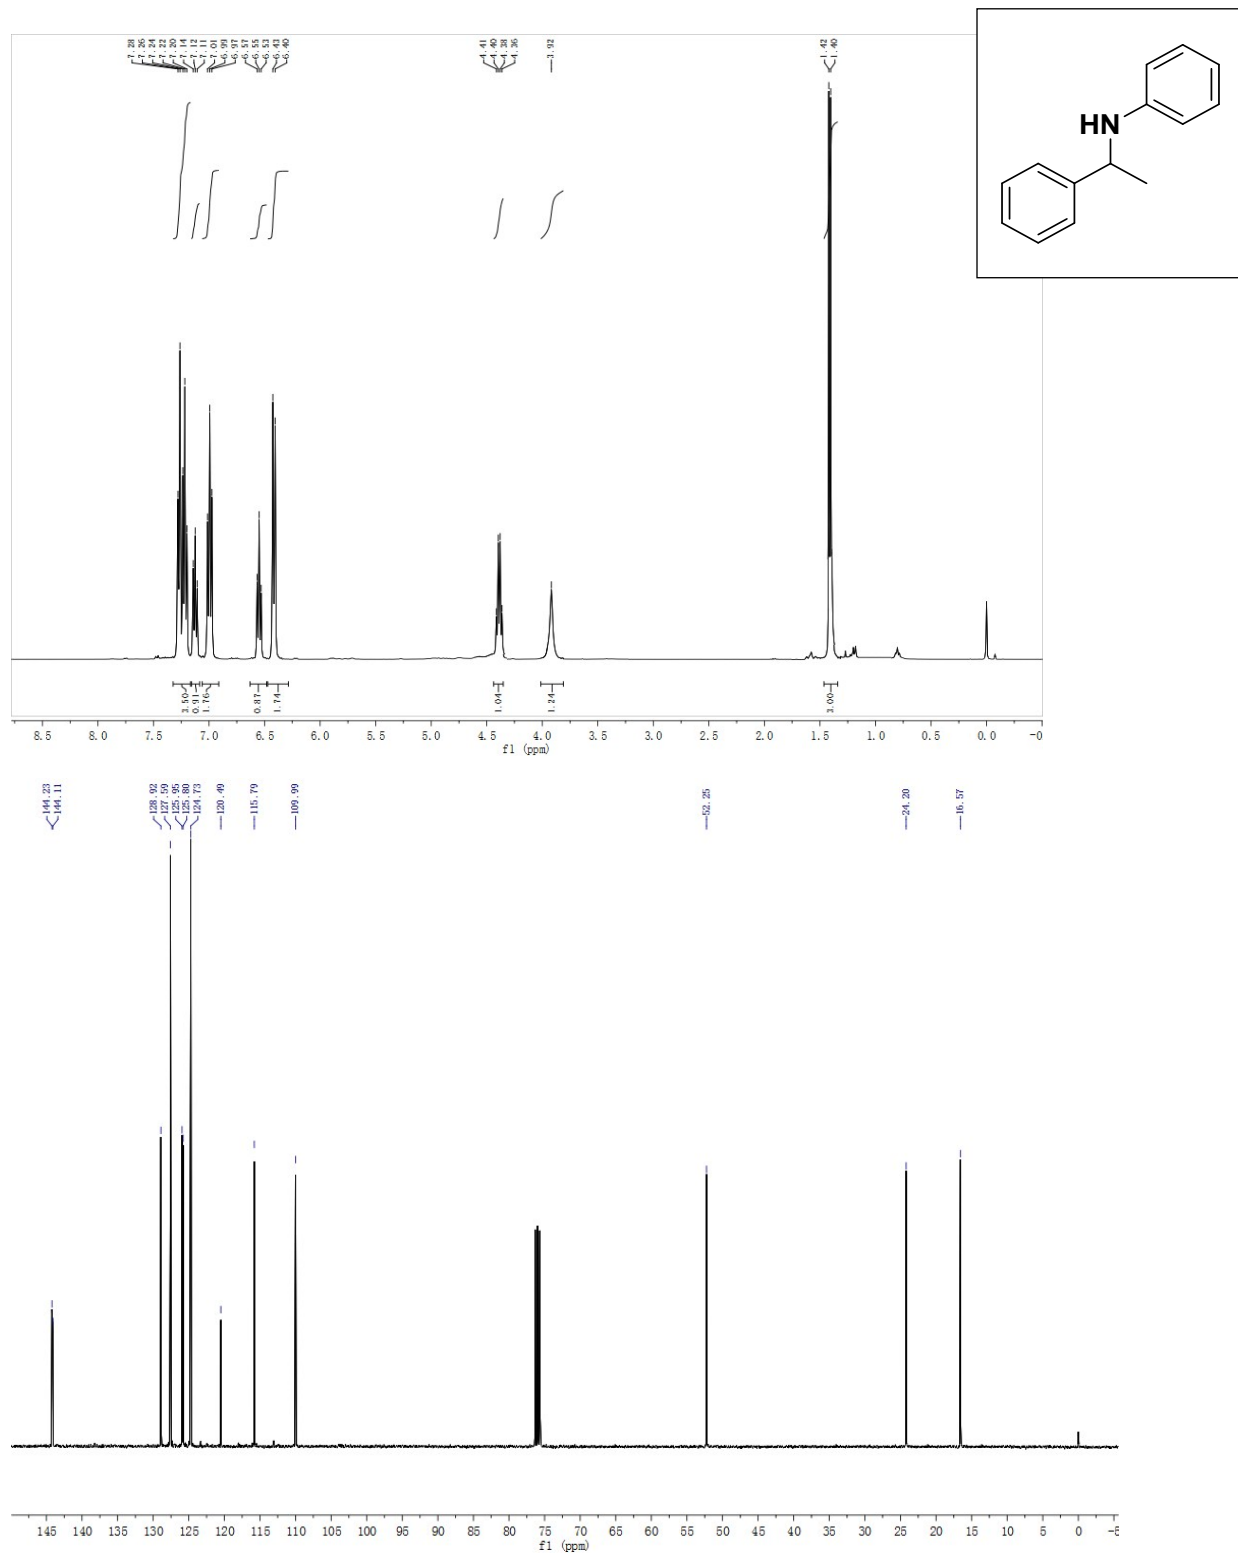



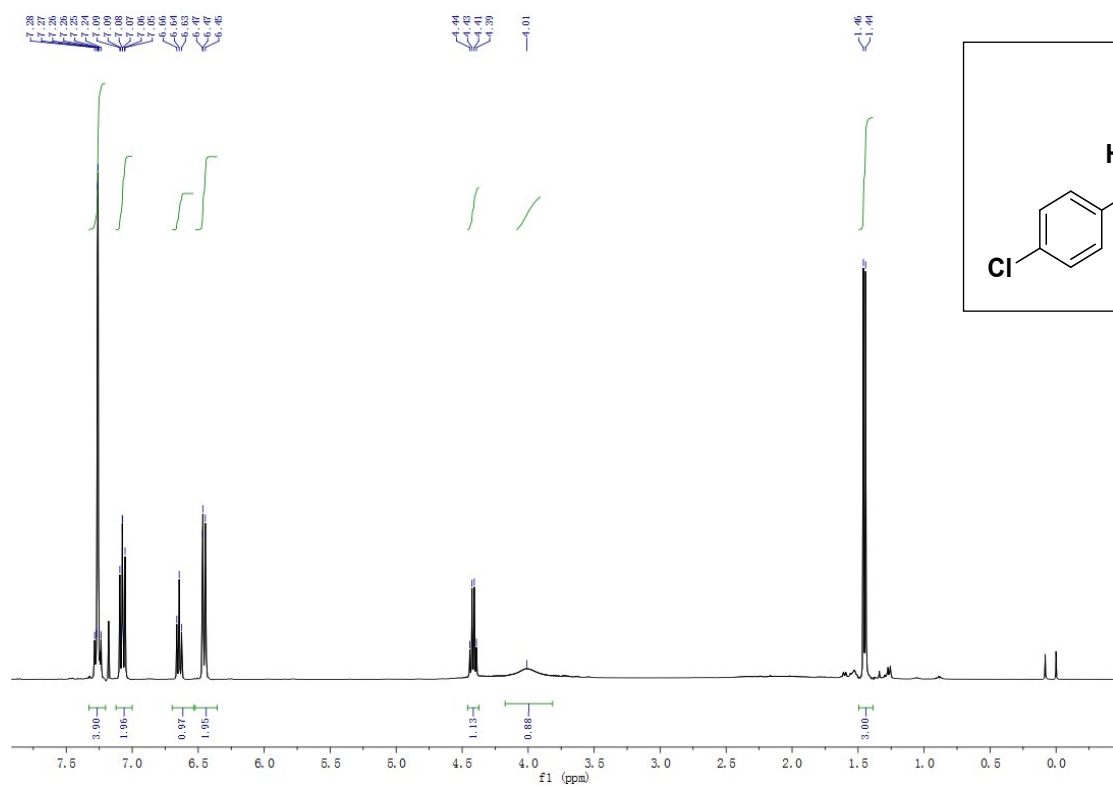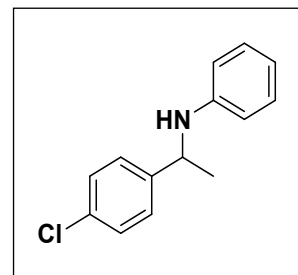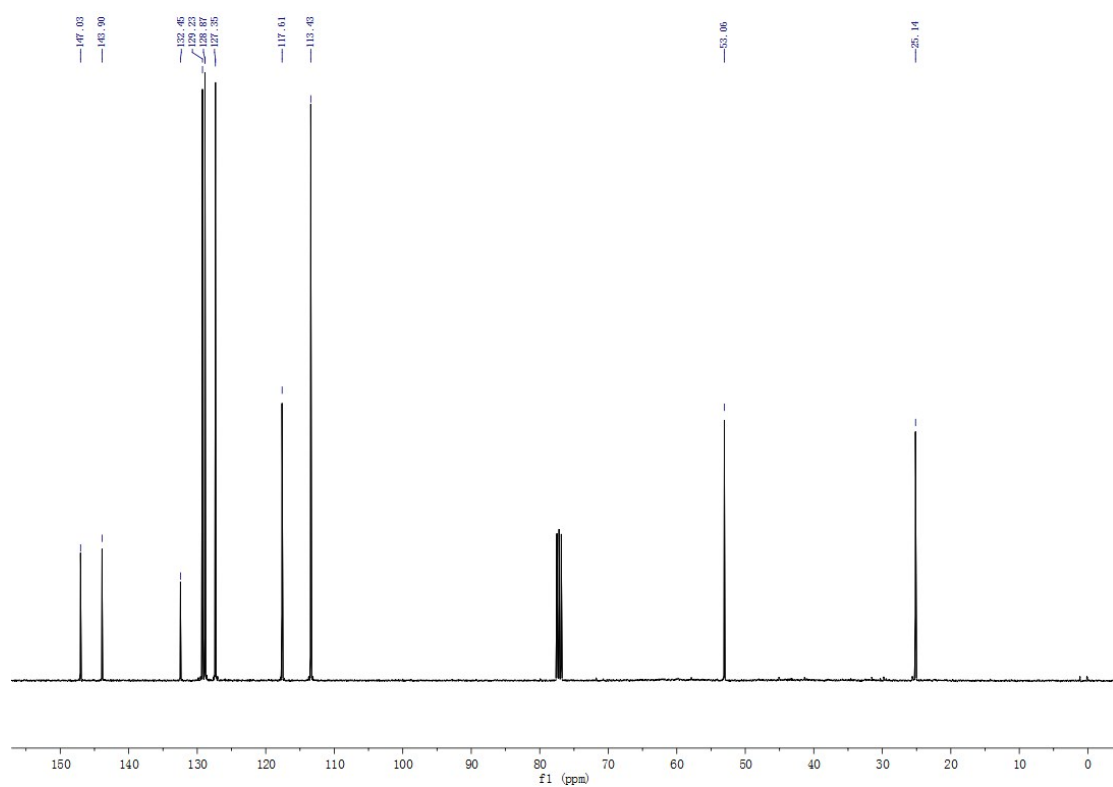

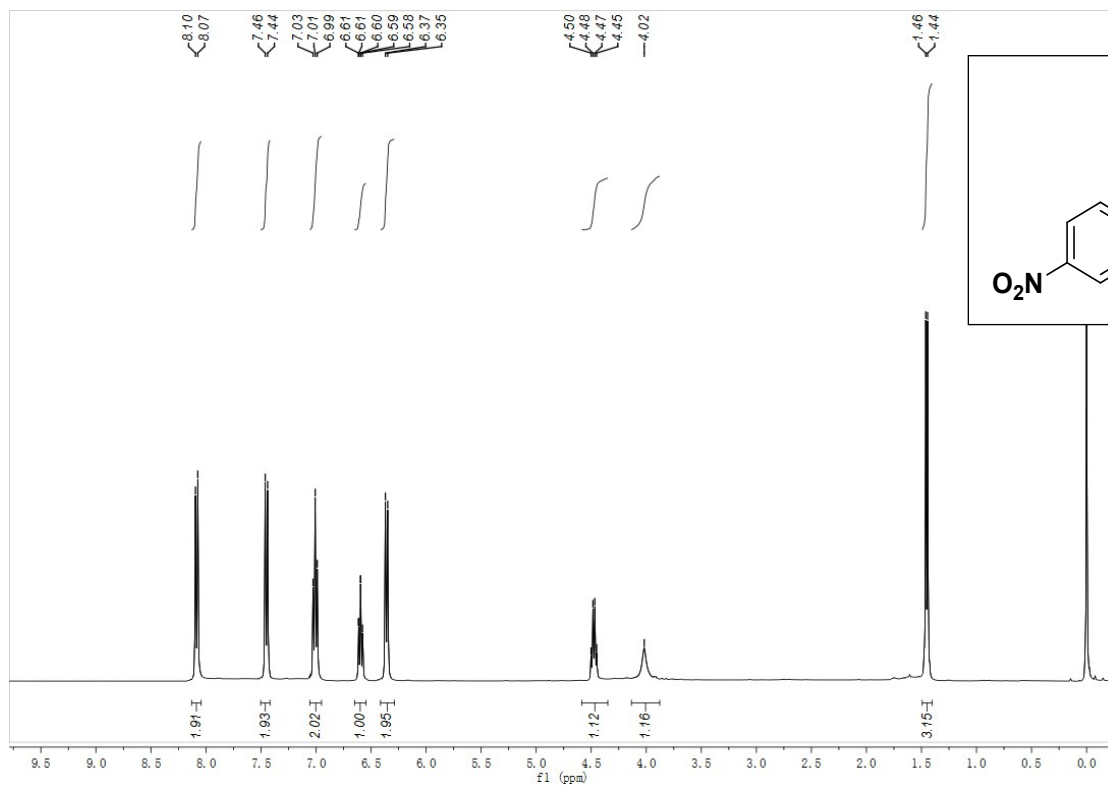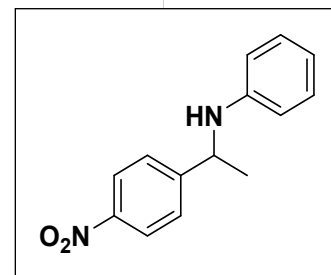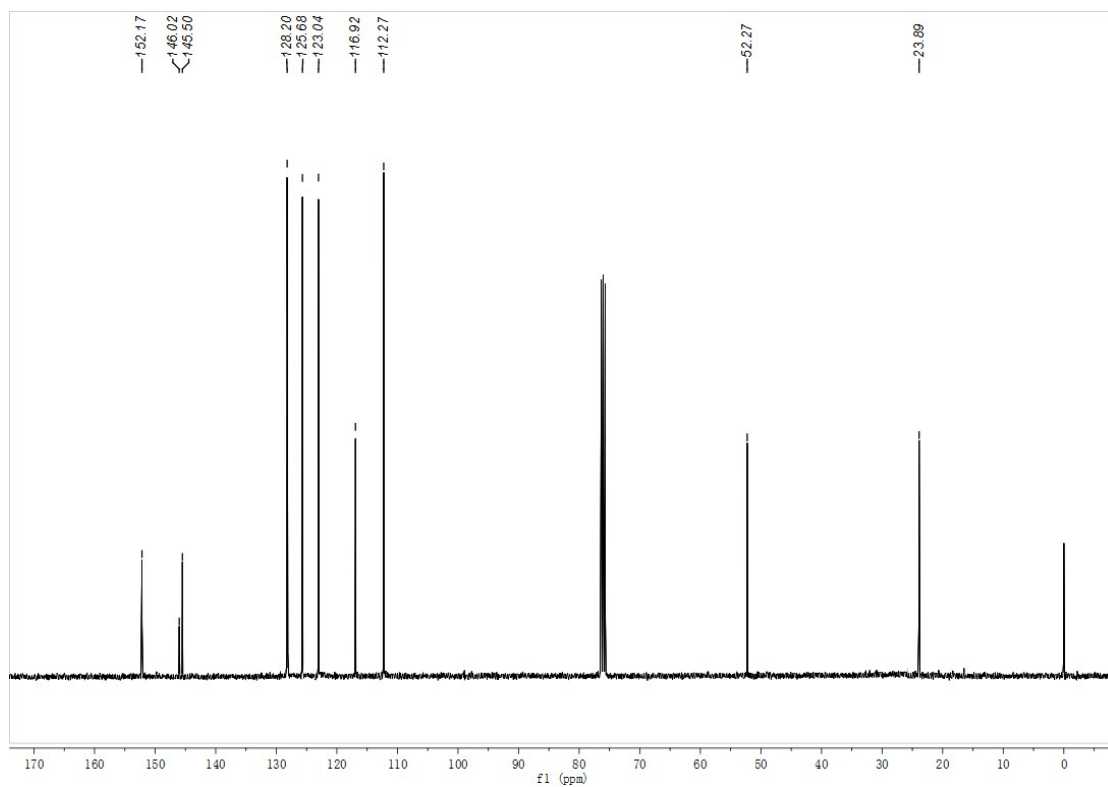



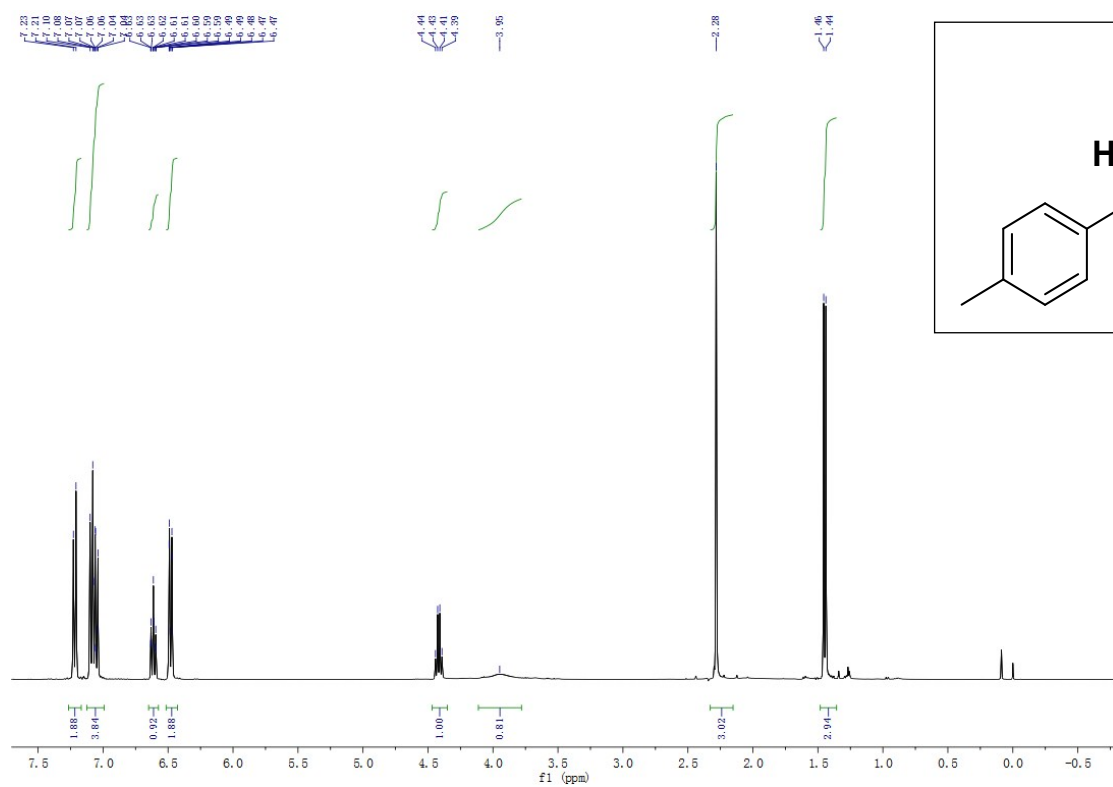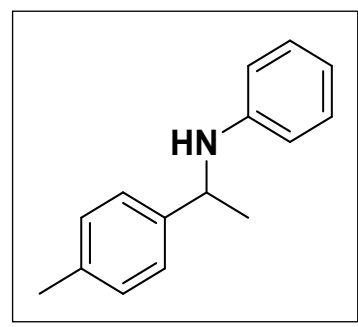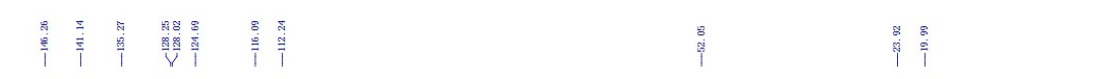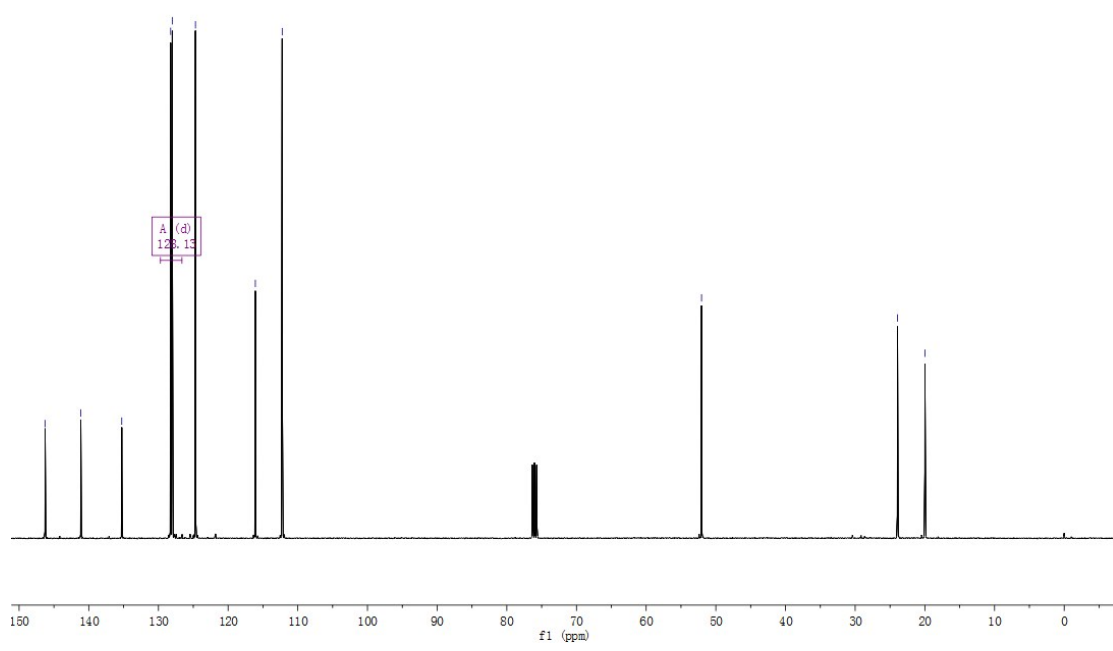

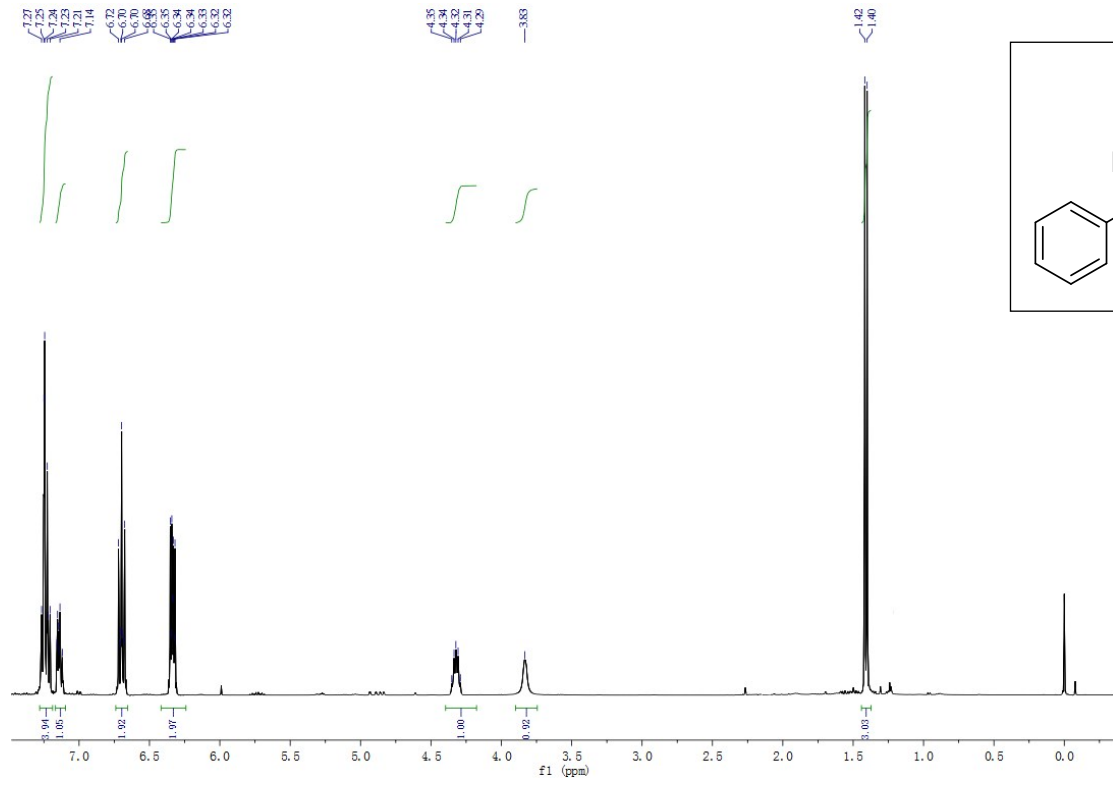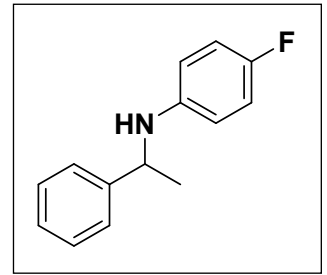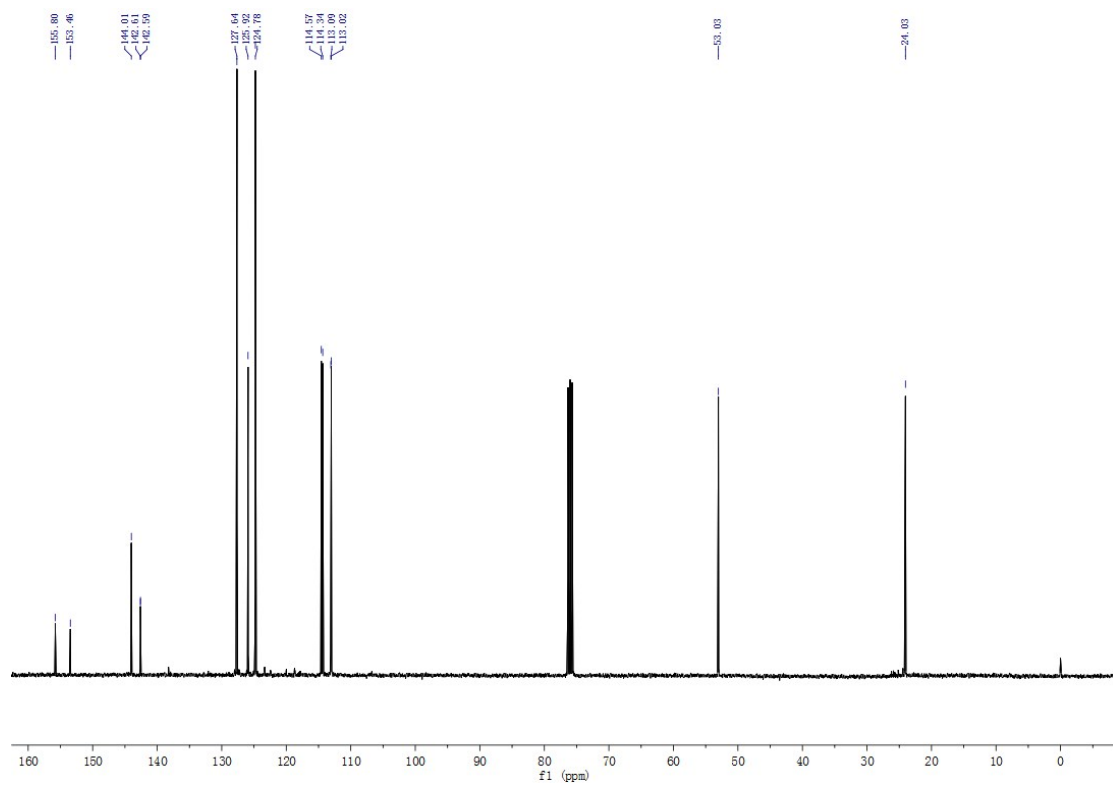

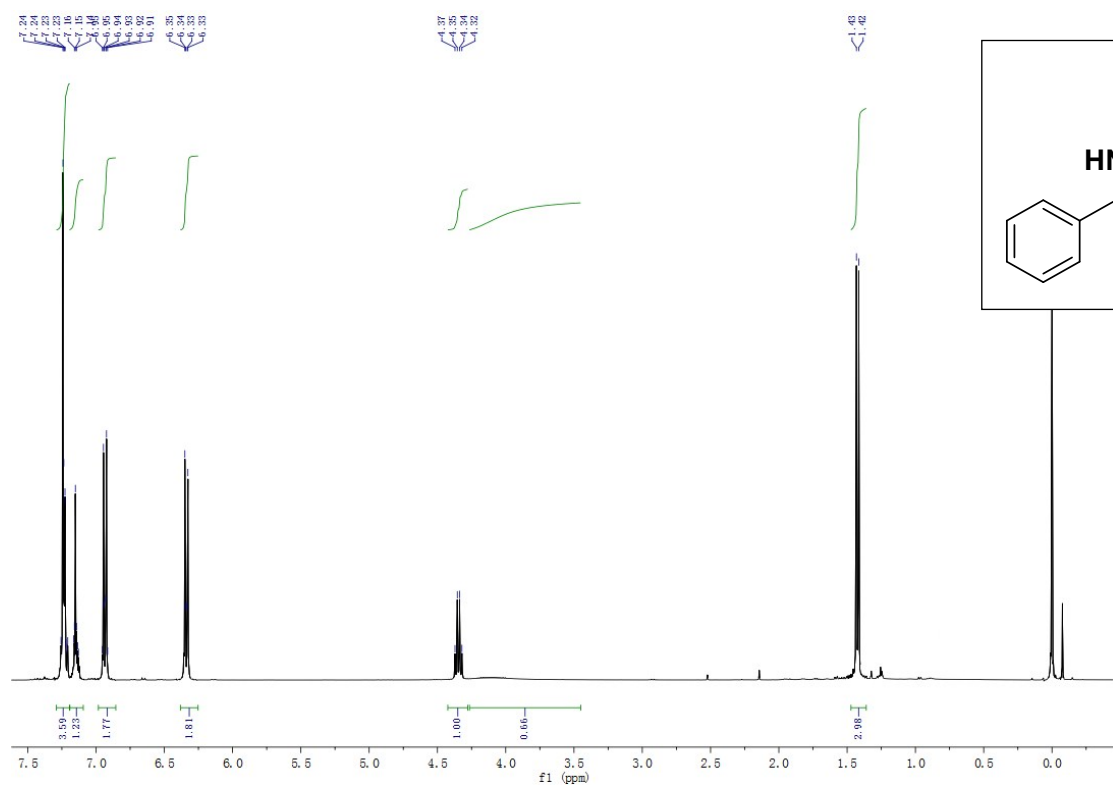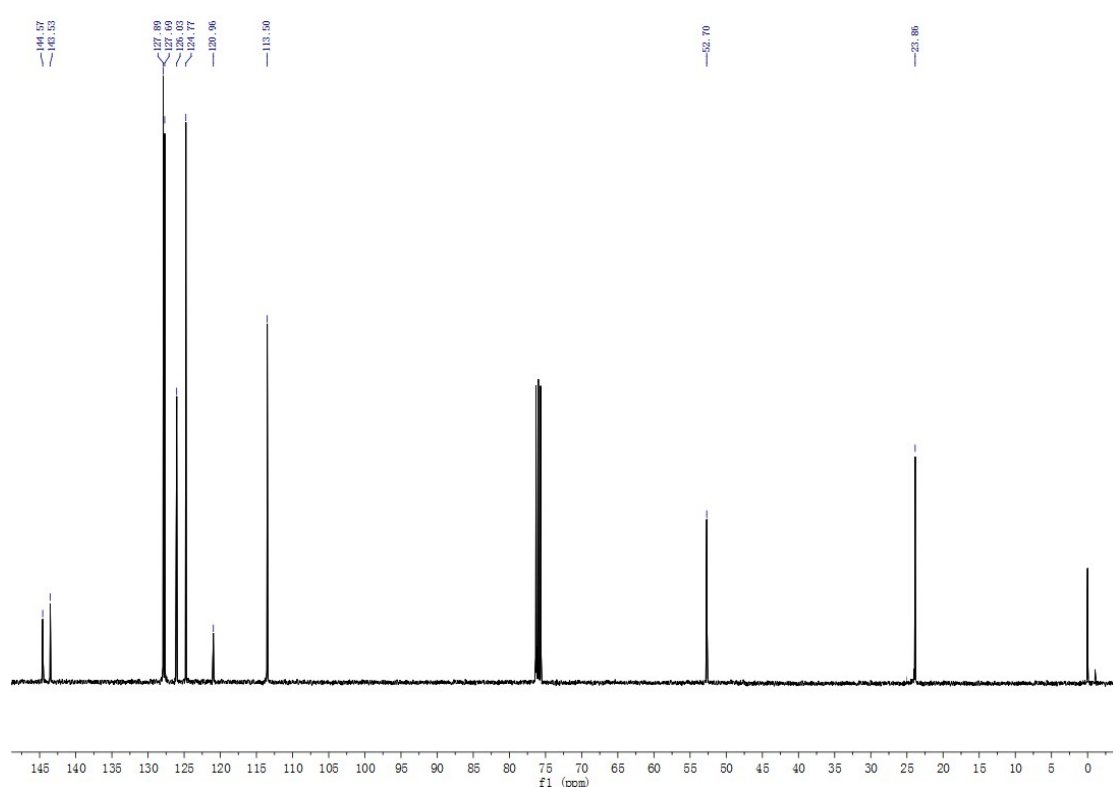

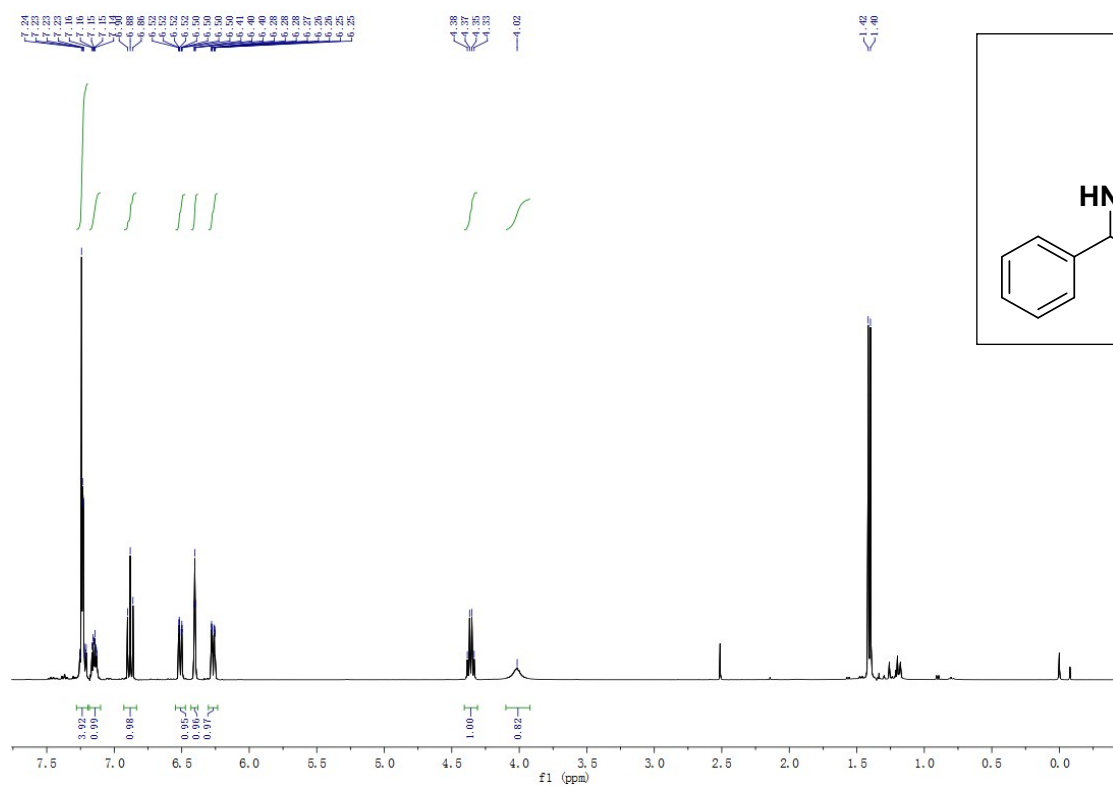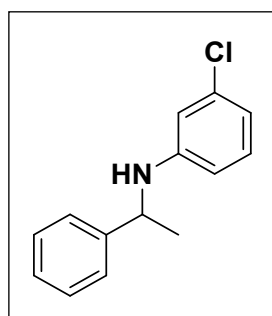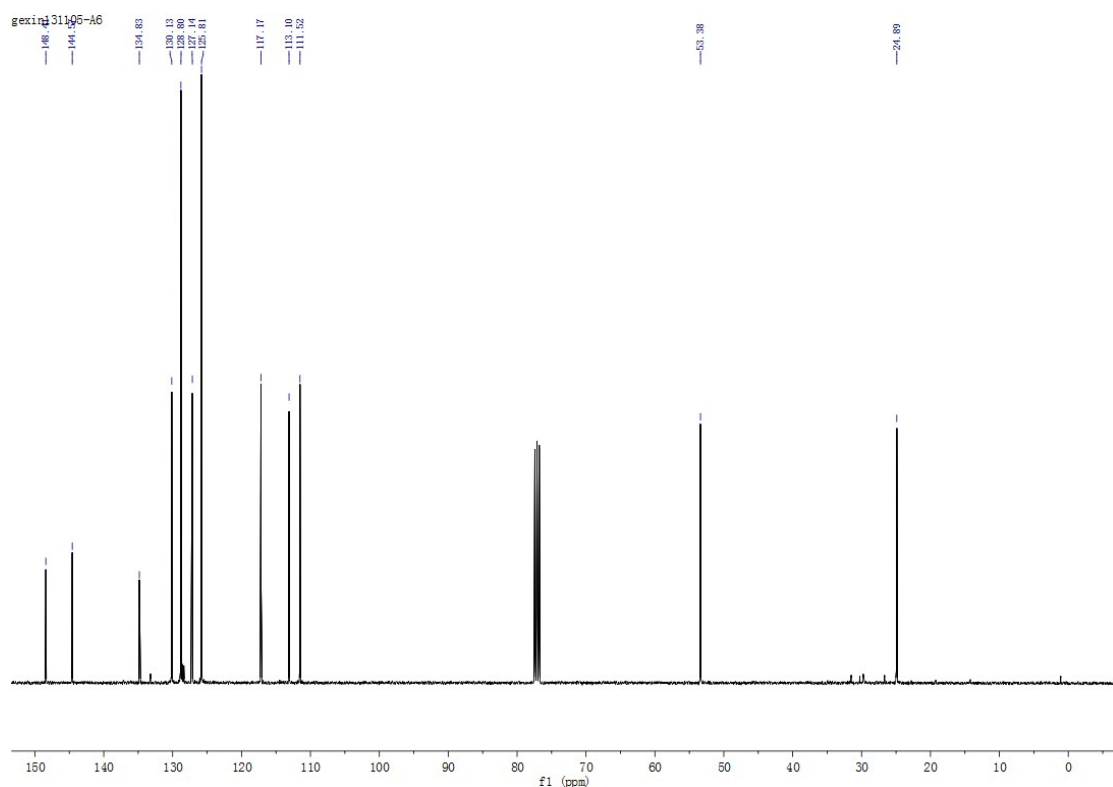

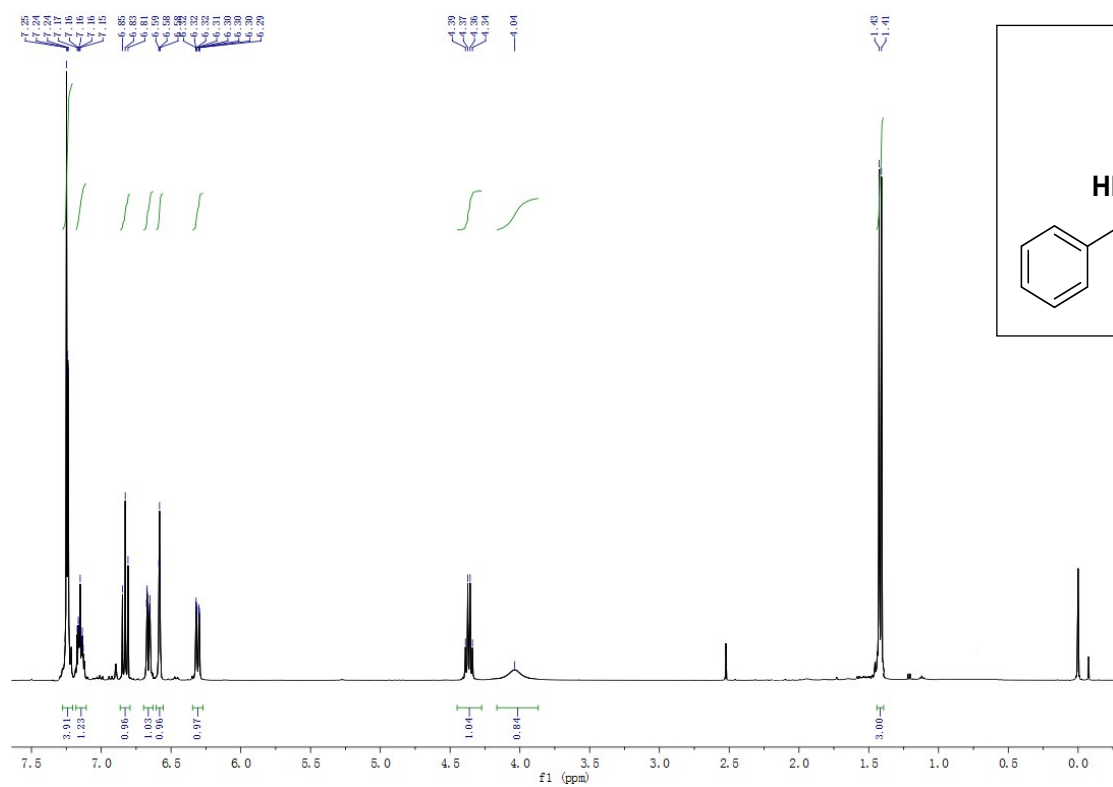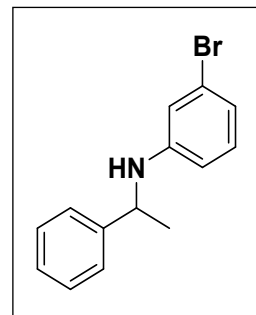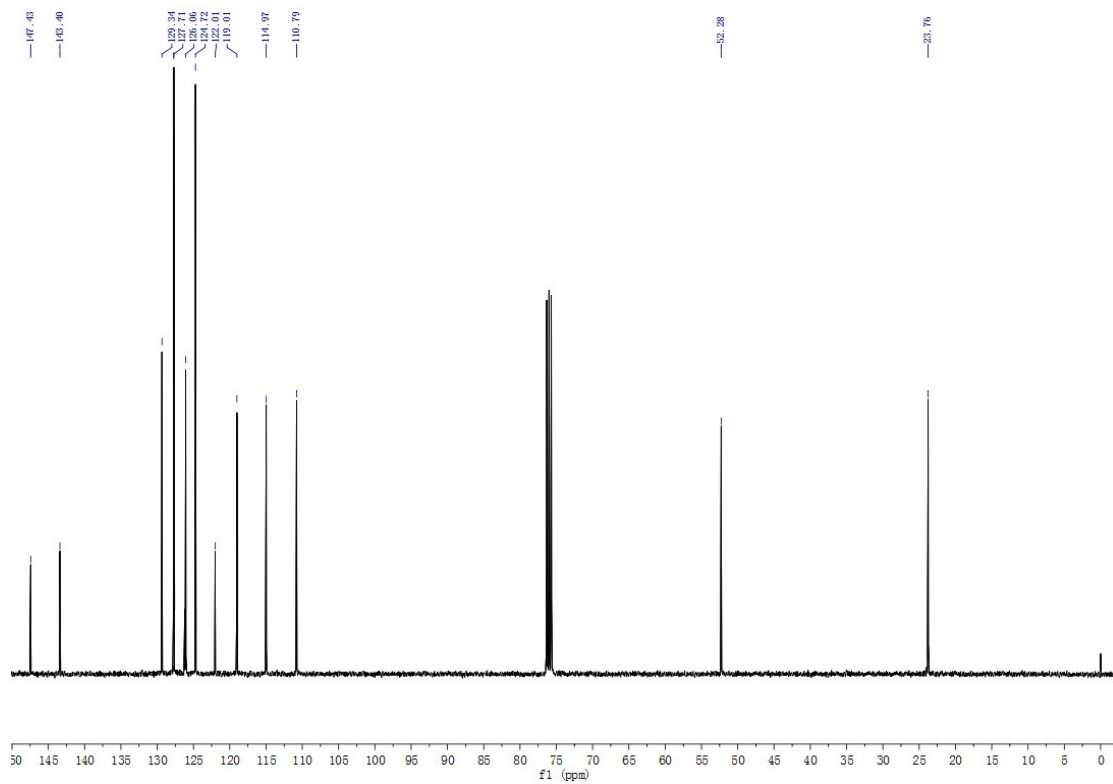

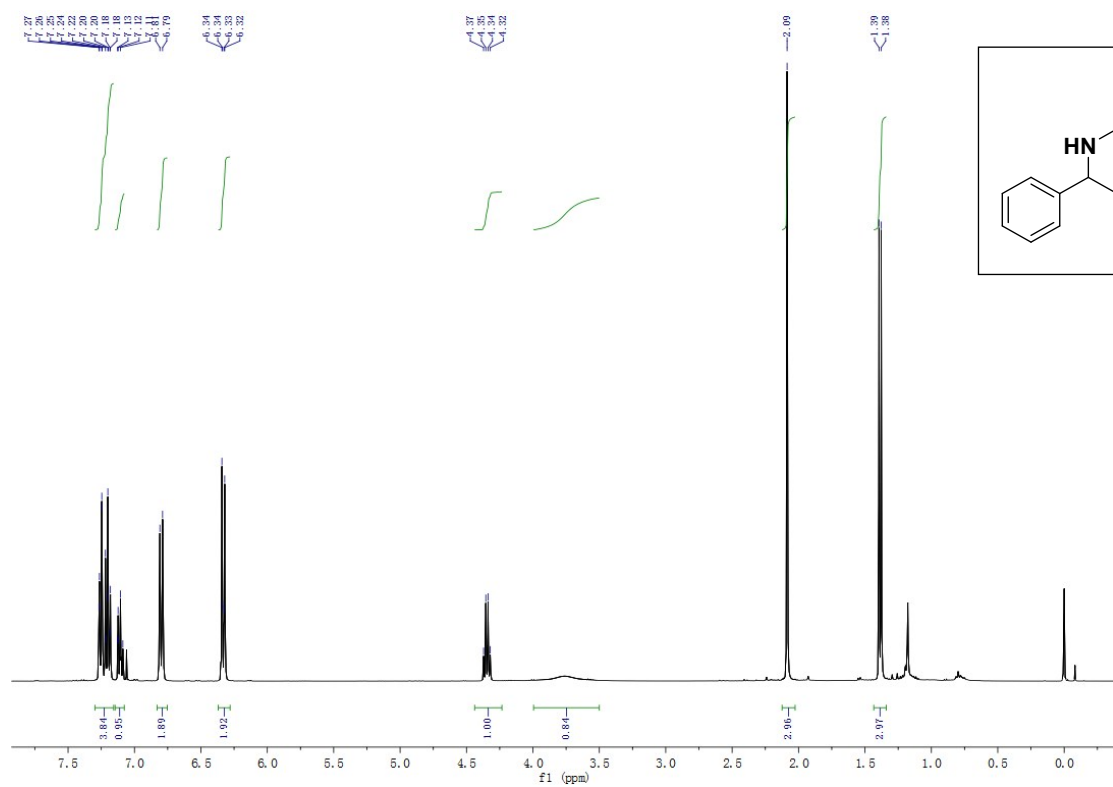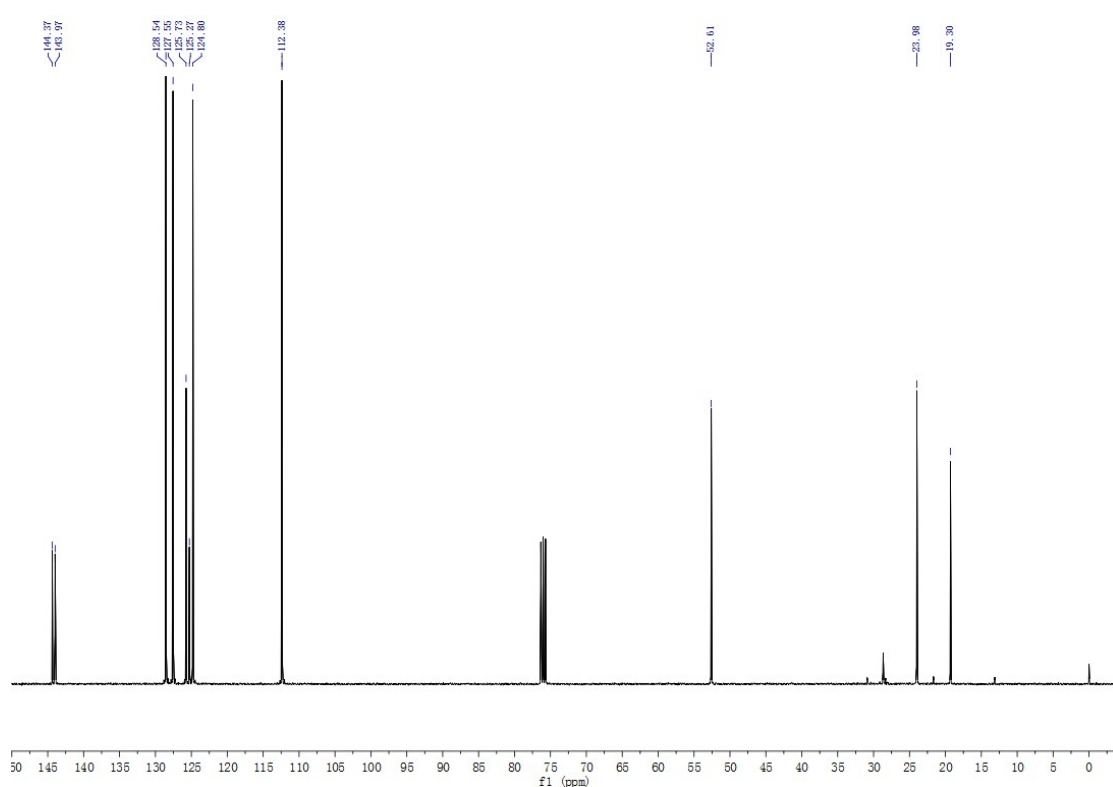

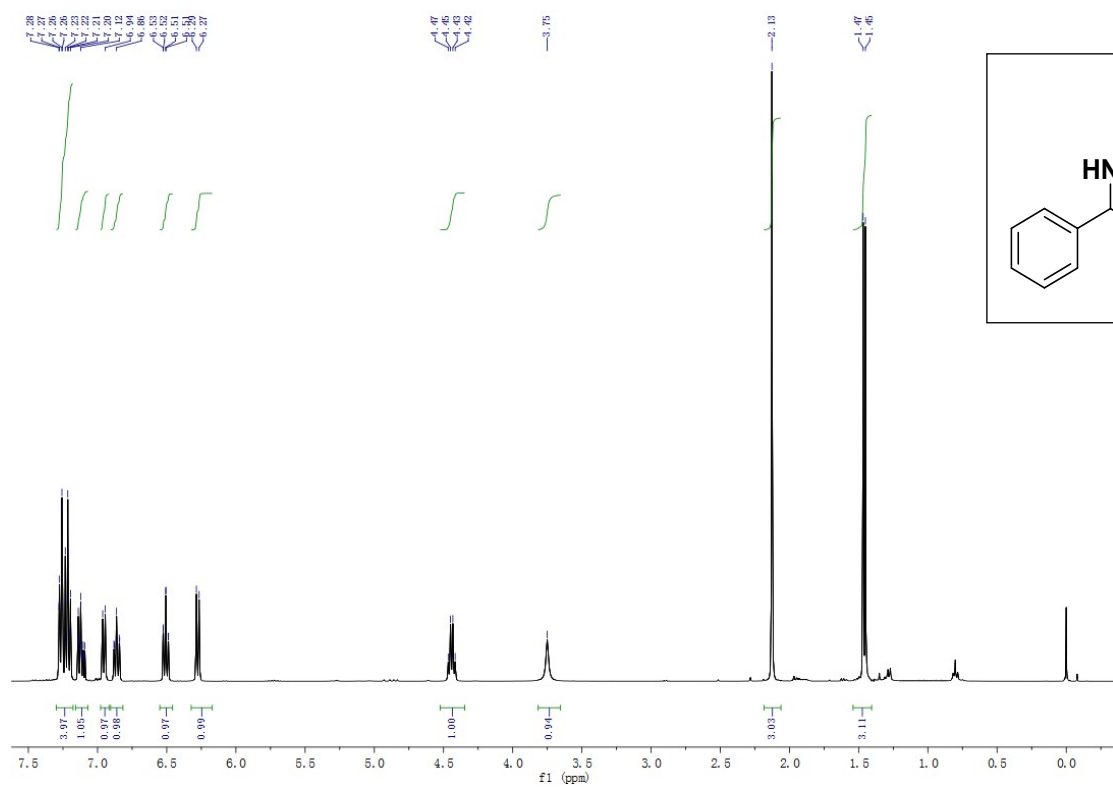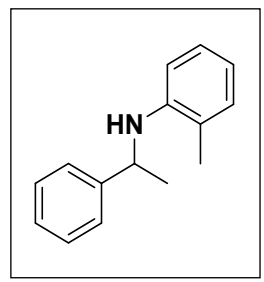

## HPLC spectra for compounds 7a-7k

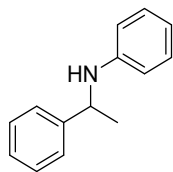

CHIRALCEL OD-H (Hexane/iPrOH = 99/1 1.0 mL/min, 254 nm)

Racemic

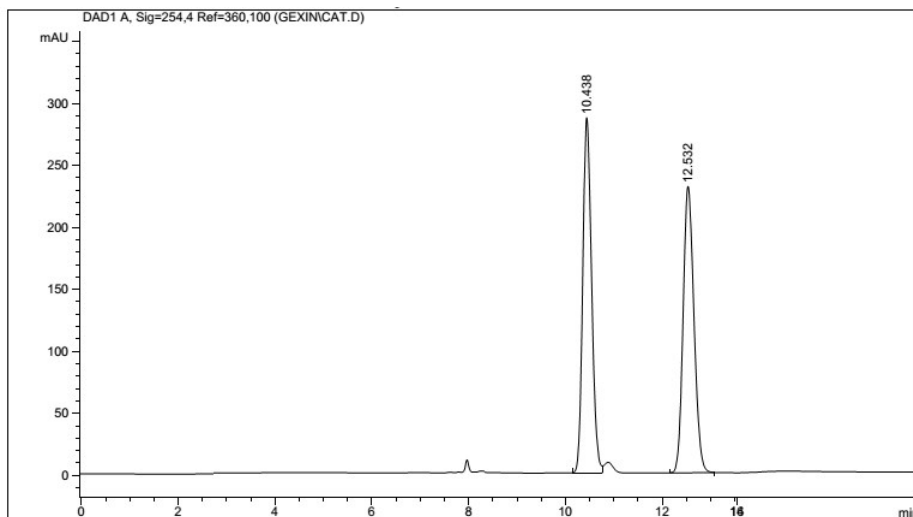

| Ret. Time [min] | Height [mAu] | Area [mAU*s] | Rel. Area [%] |
|-----------------|--------------|--------------|---------------|
| 10.438          | 286.64899    | 3639.61963   | 50.30         |
| 12.532          | 231.03723    | 3596.70337   | 49.70         |

Optically active (85% ee)

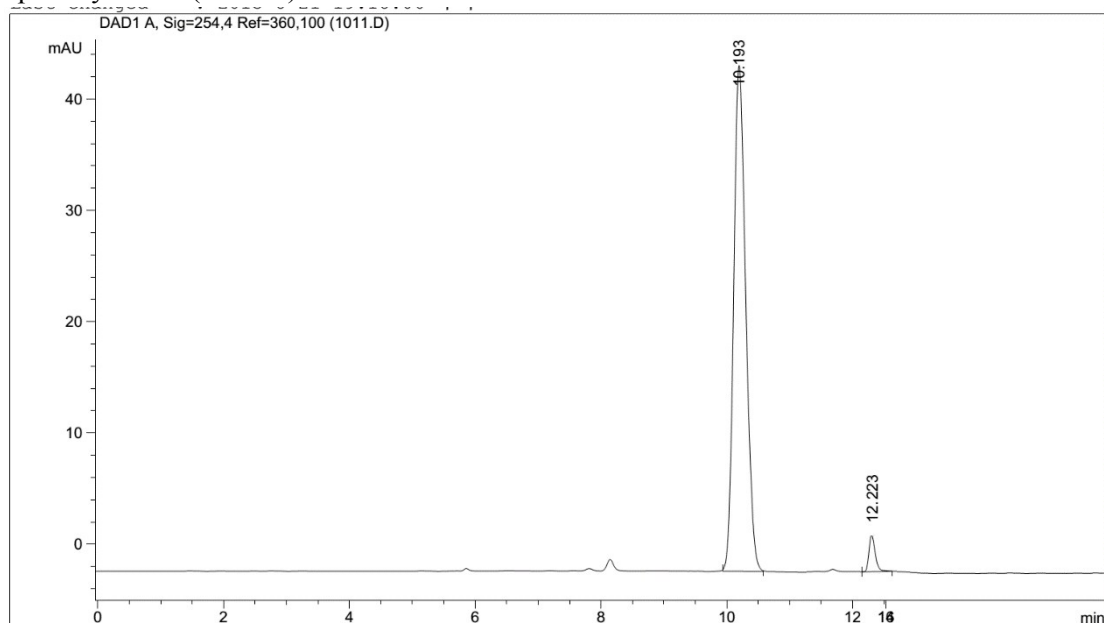



| Ret. Time [min] | Height [mAu] | Area [mAU*s] | Rel. Area [%] |
|-----------------|--------------|--------------|---------------|
| 10.193          | 45.5         | 602.1        | 92.4          |
| 12.223          | 2.7          | 49.5         | 7.6           |

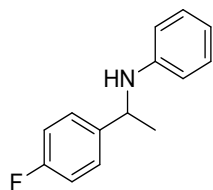

CHIRALCEL OD-H (Hexane/iPrOH = 95/5 1.0 mL/min, 254 nm)

Racemic

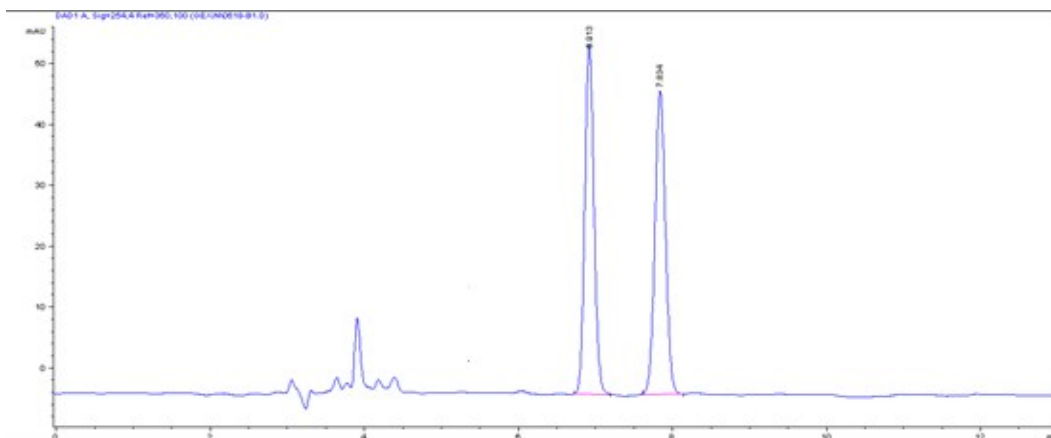

| Ret. Time [min] | Height [mAu] | Area [mAU*s] | Rel. Area [%] |
|-----------------|--------------|--------------|---------------|
| 6.913           | 57.6         | 474.4        | 49.8          |
| 7.834           | 50           | 478.9        | 50.2          |

Optically active (88% ee)

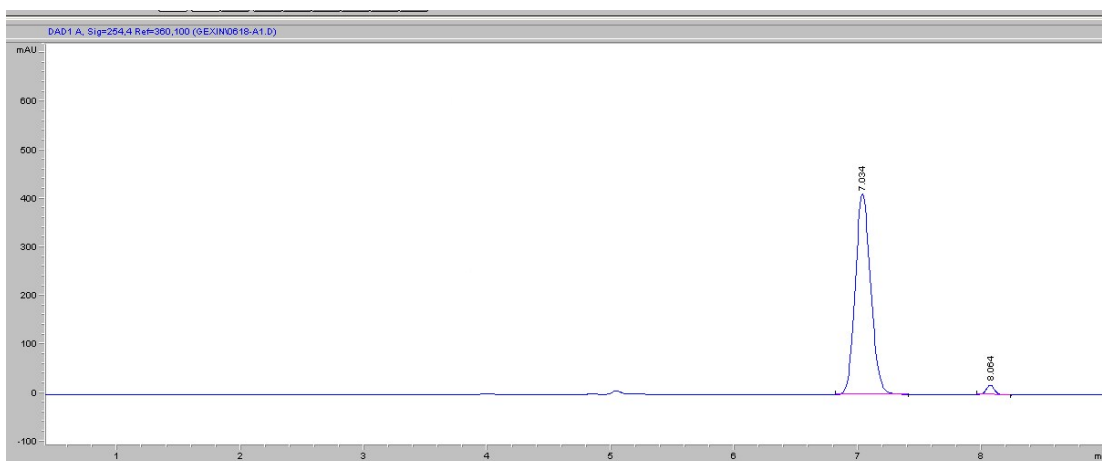

| Ret. Time [min] | Height [mAu] | Area [mAU*s] | Rel. Area [%] |
|-----------------|--------------|--------------|---------------|
| 7.034           | 412.7        | 3589.4       | 94.1          |
| 8.064           | 25.4         | 225.1        | 5.9           |

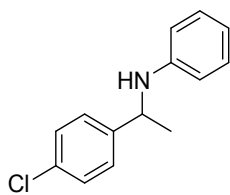

CHIRALCEL OD-H (Hexane/iPrOH = 95/5 1.0 mL/min, 254 nm)

Racemic

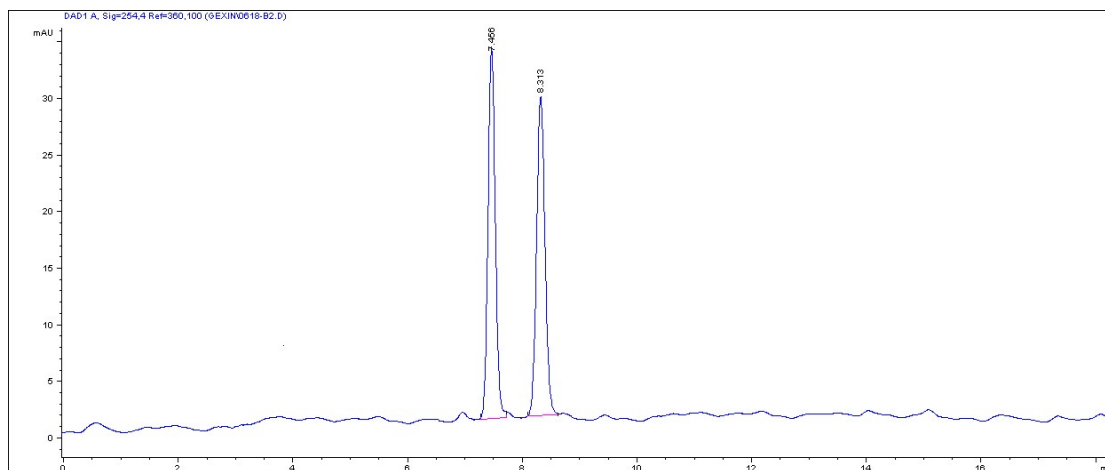

| Ret. Time [min] | Height [mAu] | Area [mAU*s] | Rel. Area [%] |
|-----------------|--------------|--------------|---------------|
| 7.456           | 32.9         | 293.6        | 50.4          |
| 8.313           | 28.3         | 288.6        | 49.6          |

Optically active (91% ee)

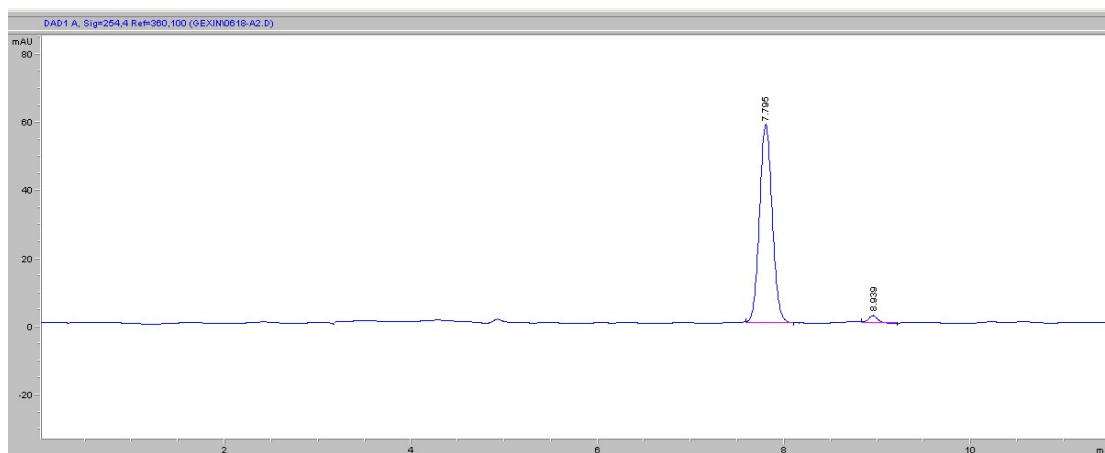

| Ret. Time [min] | Height [mAu] | Area [mAU*s] | Rel. Area [%] |
|-----------------|--------------|--------------|---------------|
| 7.795           | 58.2         | 549.8        | 95.6          |
| 8.939           | 2.3          | 25.3         | 4.4           |

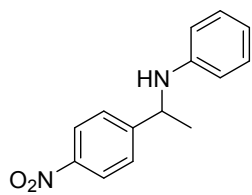

CHIRALCEL OD-H (Hexane/iPrOH = 85/15 1.0 mL/min, 254 nm)

Racemic

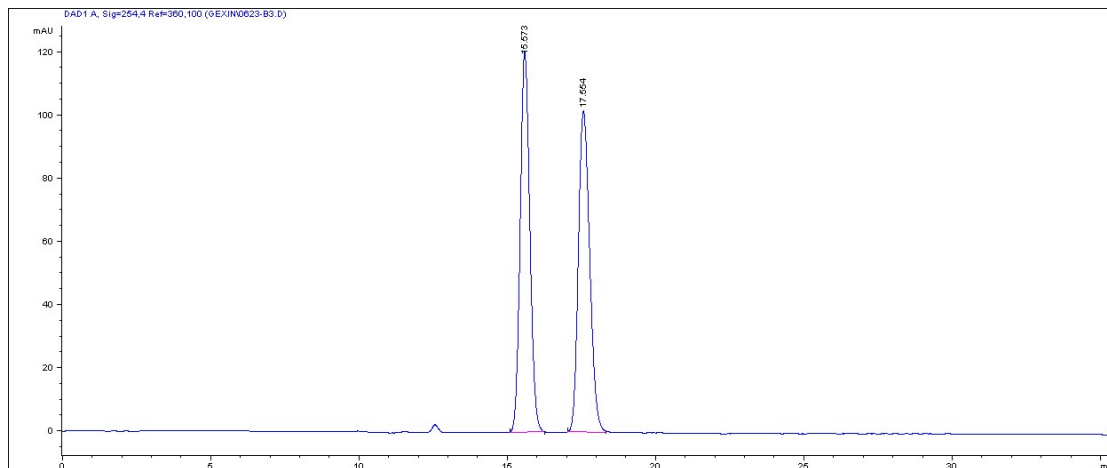

| Ret. Time [min] | Height [mAu] | Area [mAU*s] | Rel. Area [%] |
|-----------------|--------------|--------------|---------------|
| 15.573          | 120.4        | 2717.9       | 50.1          |
| 17.554          | 101.7        | 2706.7       | 49.9          |

Optically active (92% ee)

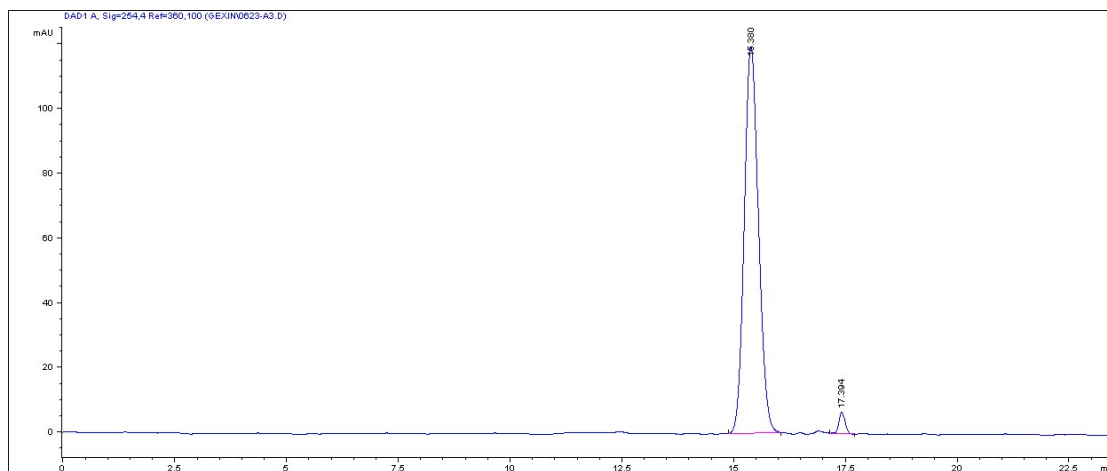

| Ret. Time [min] | Height [mAu] | Area [mAU*s] | Rel. Area [%] |
|-----------------|--------------|--------------|---------------|
| 15.38           | 119.5        | 2637.1       | 96.2          |
| 17.394          | 8.1          | 104.1        | 3.8           |

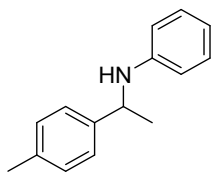

CHIRALCEL OD-H (Hexane/iPrOH = 99/1 1.0 mL/min, 254 nm)

Racemic

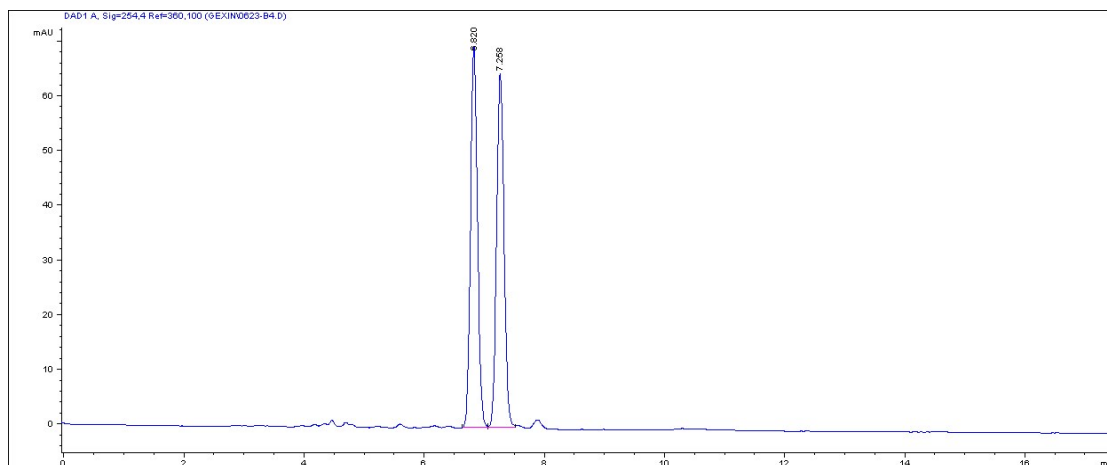

| Ret. Time [min] | Height [mAU] | Area [mAU*s] | Rel. Area [%] |
|-----------------|--------------|--------------|---------------|
| 6.820           | 69.8         | 564.5        | 50.4          |
| 7.258           | 64.7         | 555.8        | 49.6          |

Optically active (67% ee)

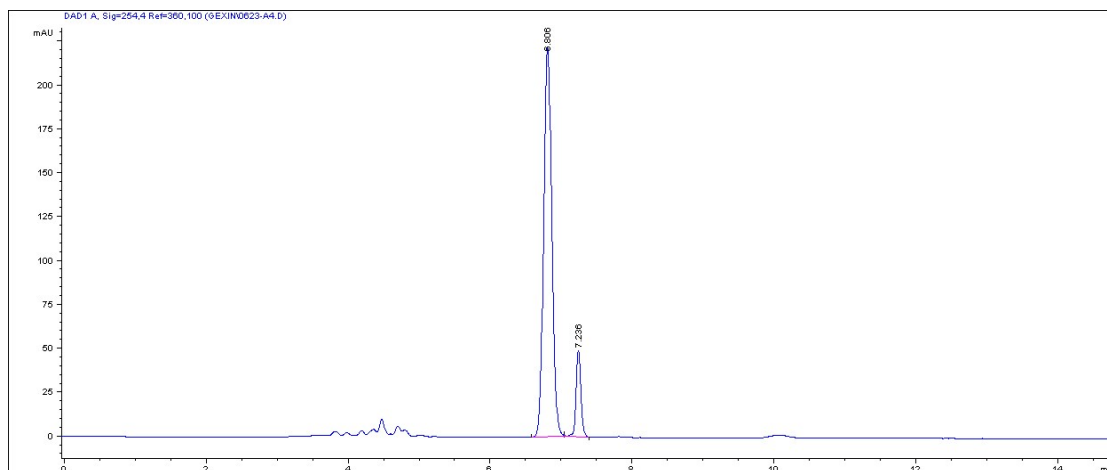

| Ret. Time [min] | Height [mAU] | Area [mAU*s] | Rel. Area [%] |
|-----------------|--------------|--------------|---------------|
| 6.806           | 222.1        | 1785.5       | 83.3          |
| 7.236           | 50.4         | 358.0        | 16.7          |

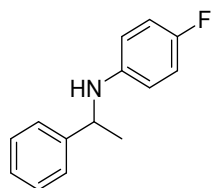

CHIRALCEL OD-H (Hexane/iPrOH = 99/1 1.0 mL/min, 254 nm)

Racemic

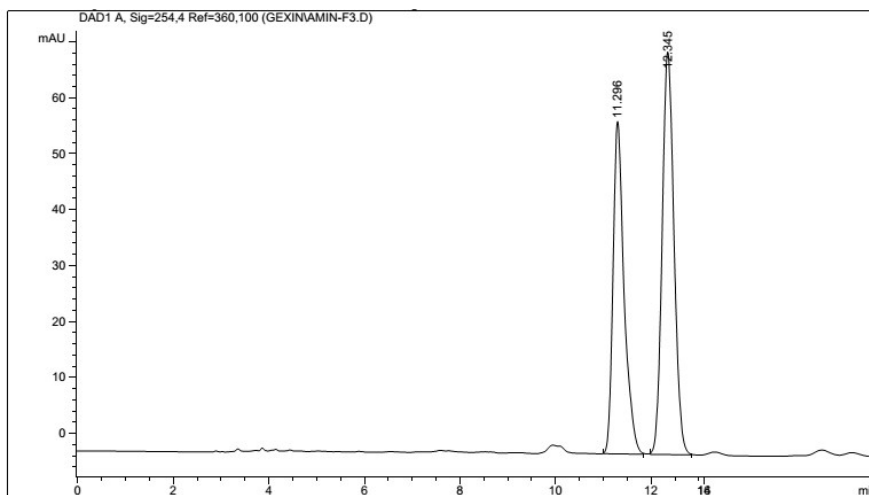

| Ret. Time [min] | Height [mAU] | Area [mAU*s] | Rel. Area [%] |
|-----------------|--------------|--------------|---------------|
| 11.296          | 59.45957     | 1229.34862   | 49.92         |
| 12.345          | 72.01638     | 1233.52612   | 50.08         |

Optically active (81% ee)

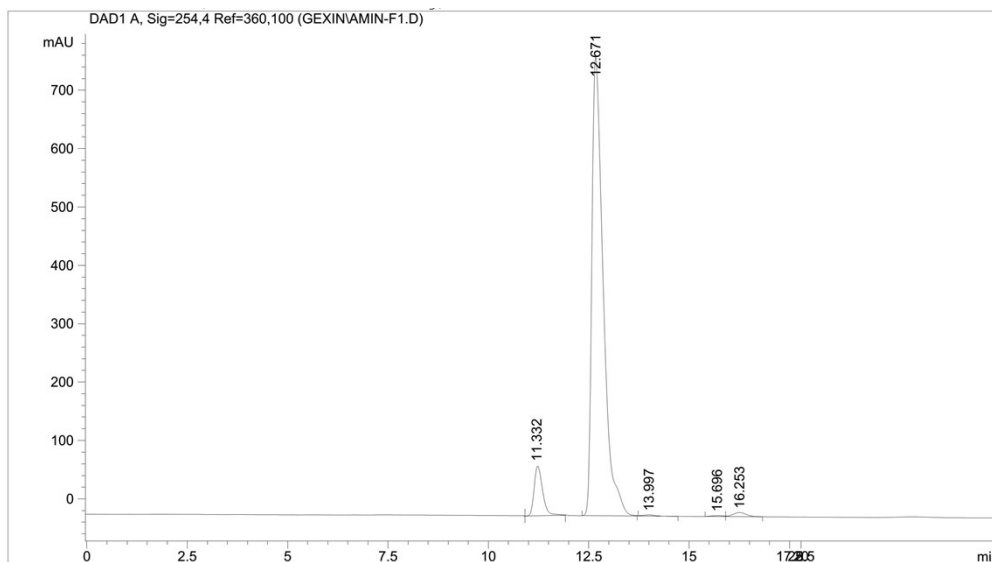

| Ret. Time [min] | Height [mAU] | Area [mAU*s] | Rel. Area [%] |
|-----------------|--------------|--------------|---------------|
| 11.332          | 82.75500     | 1555.7       | 9.2           |
| 12.671          | 785.48450    | 1.54401e4    | 90.8          |

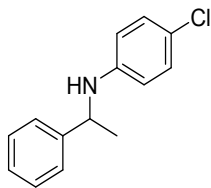

CHIRALCEL OD-H (Hexane/iPrOH = 95/5 1.0 mL/min, 254 nm)

Racemic

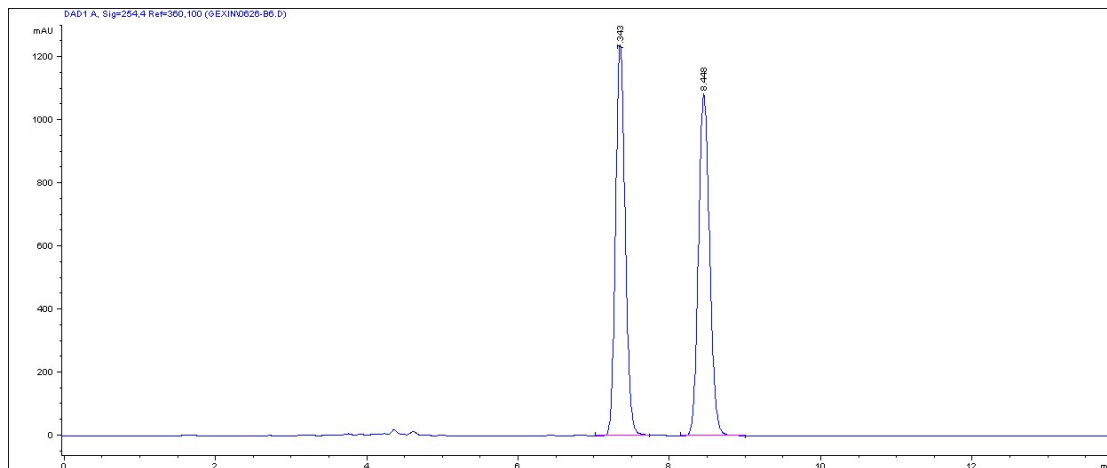

| Ret.Time [min] | Height [mAu] | Area [mAU*s] | Rel.Area [%] |
|----------------|--------------|--------------|--------------|
| 7.343          | 1239.8       | 10994.6      | 49.7         |
| 8.448          | 1084.1       | 11125.1      | 50.3         |

Optically active (83% ee)

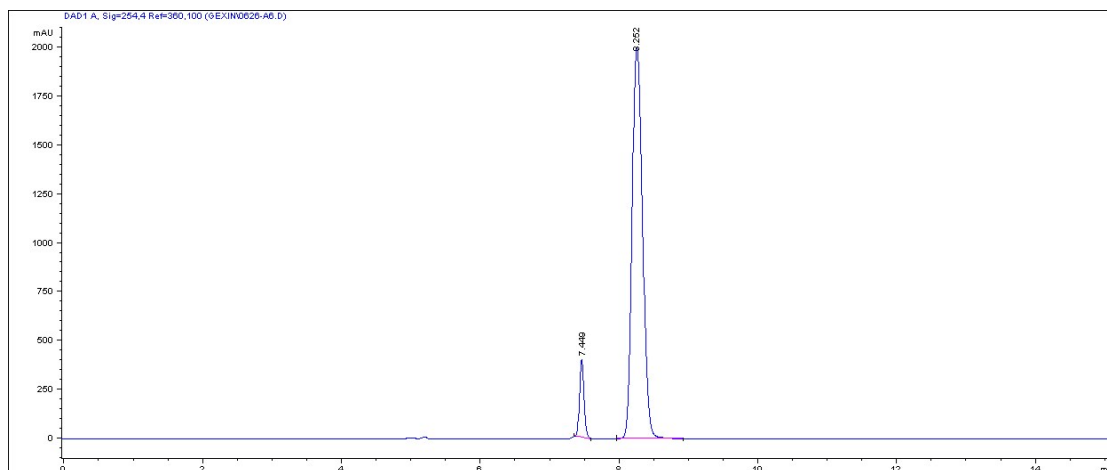

| Ret.Time [min] | Height [mAu] | Area [mAU*s] | Rel.Area [%] |
|----------------|--------------|--------------|--------------|
| 7.440          | 432.4        | 1947.6       | 8.5          |
| 8.252          | 2003.2       | 20946.3      | 91.5         |

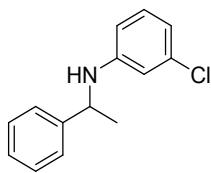

CHIRALCEL OD-H (Hexane/iPrOH = 95/5 1.0 mL/min, 254 nm)

Racemic

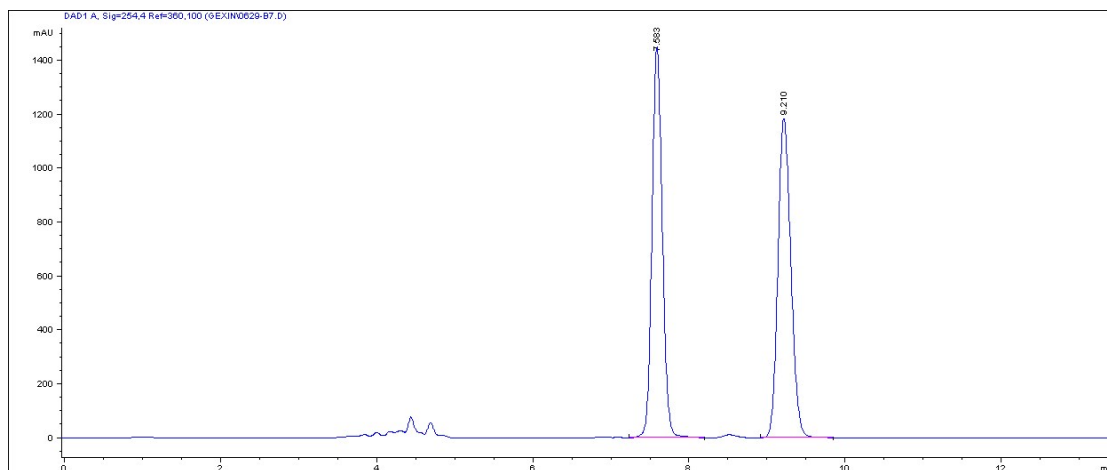

| Ret. Time [min] | Height [mAu] | Area [mAU*s] | Rel. Area [%] |
|-----------------|--------------|--------------|---------------|
| 7.583           | 1450.1       | 13323.2      | 49.4          |
| 9.210           | 1184.4       | 13624        | 50.6          |

Optically active (74% ee)

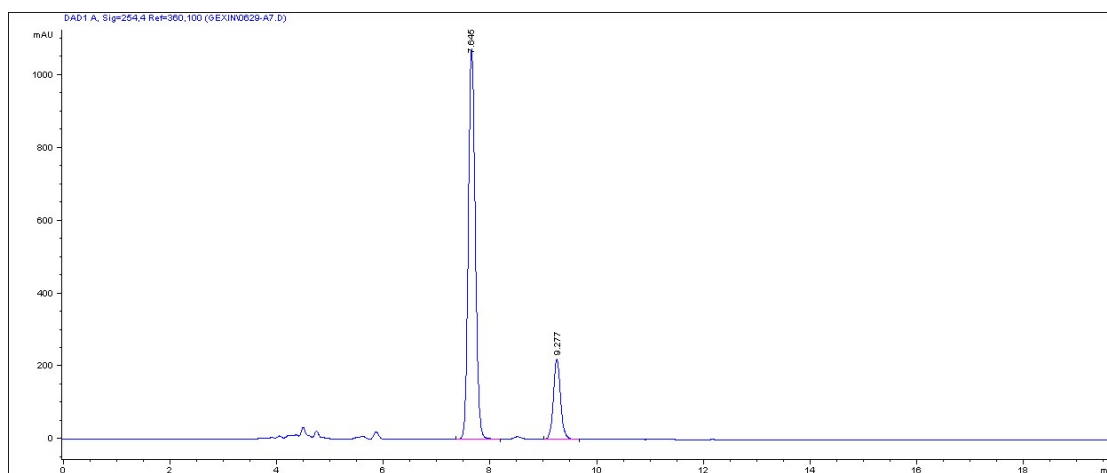

| Ret. Time [min] | Height [mAu] | Area [mAU*s] | Rel. Area [%] |
|-----------------|--------------|--------------|---------------|
| 7.645           | 1072.8       | 9687.8       | 87.1          |
| 9.277           | 205.1        | 1434.6       | 12.9          |

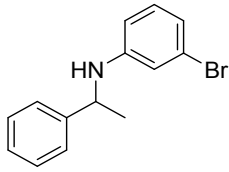

CHIRALCEL OD-H (Hexane/iPrOH = 95/5 1.0 mL/min, 254 nm)

Racemic

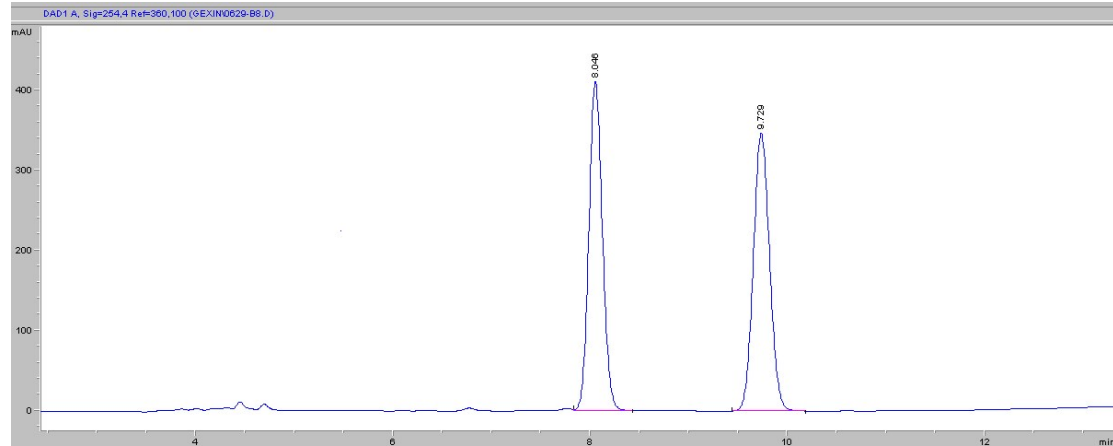

| Ret. Time [min] | Height [mAu] | Area [mAU*s] | Rel. Area [%] |
|-----------------|--------------|--------------|---------------|
| 8.046           | 411.8        | 3920.4       | 49.7          |
| 9.729           | 347.6        | 3972.2       | 50.3          |

Optically active (86% ee)

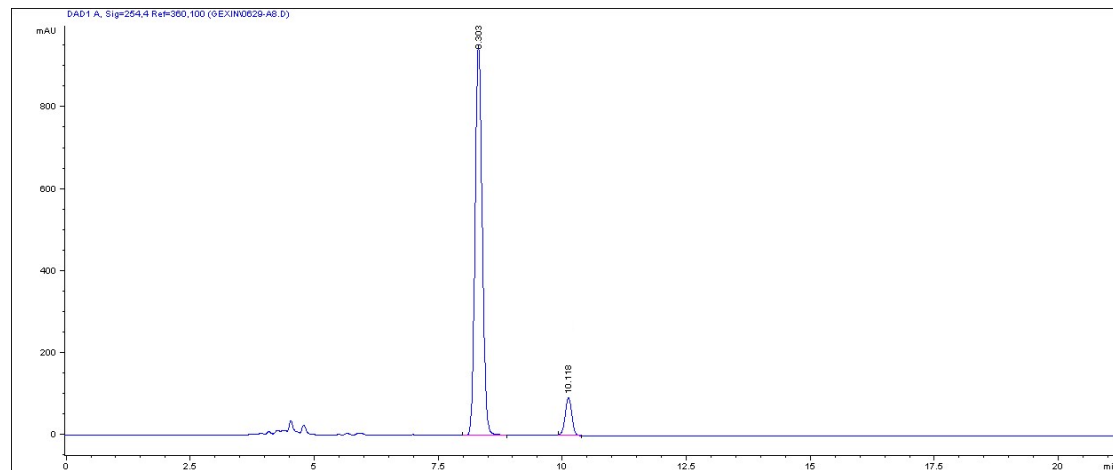

| Ret. Time [min] | Height [mAu] | Area [mAU*s] | Rel. Area [%] |
|-----------------|--------------|--------------|---------------|
| 8.303           | 953.0        | 9503         | 92.8          |
| 10.118          | 98.7         | 737.3        | 7.2           |



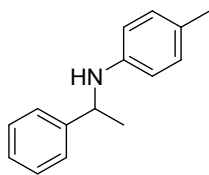

CHIRALCEL OD-H (Hexane/iPrOH = 99/1 1.0 mL/min, 254 nm)

Racemic

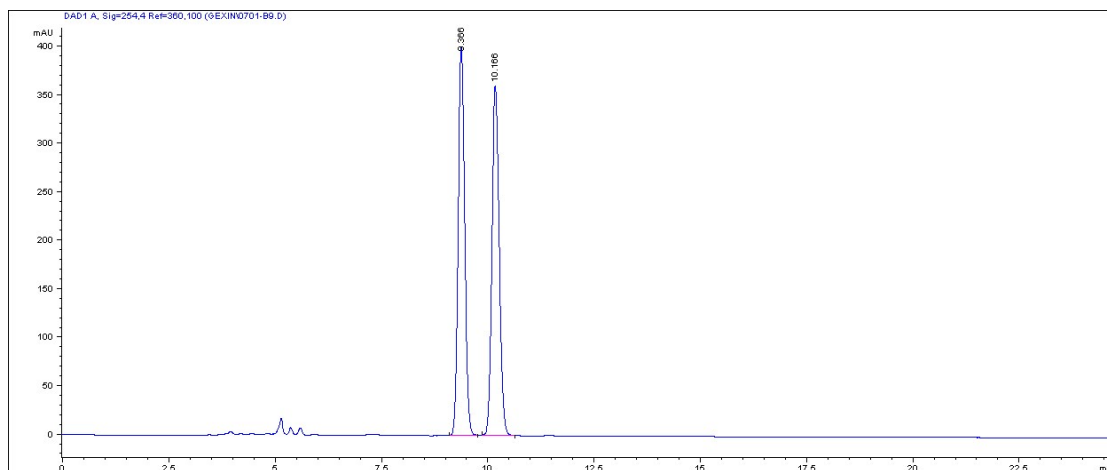

| Ret. Time [min] | Height [mAU] | Area [mAU*s] | Rel. Area [%] |
|-----------------|--------------|--------------|---------------|
| 9.366           | 401          | 4275         | 49.9          |
| 10.166          | 361.1        | 4291.1       | 50.1          |

Optically active (52% ee)

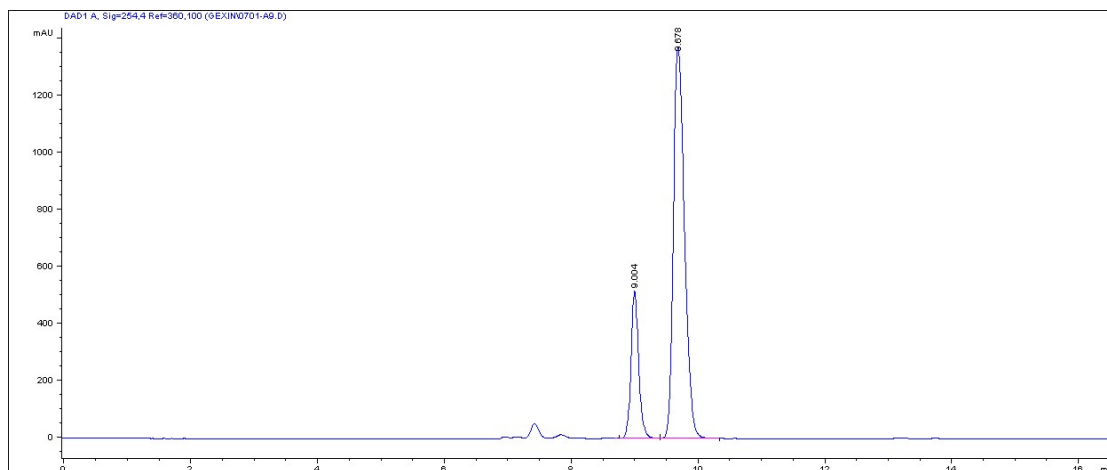

| Ret. Time [min] | Height [mAU] | Area [mAU*s] | Rel. Area [%] |
|-----------------|--------------|--------------|---------------|
| 9.004           | 507.4        | 5244.7       | 23.9          |
| 9.678           | 1372.2       | 16699.8      | 76.1          |

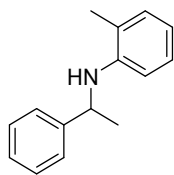

CHIRALCEL OD-H (Hexane/iPrOH = 99/1 1.0 mL/min, 254 nm)

Racemic

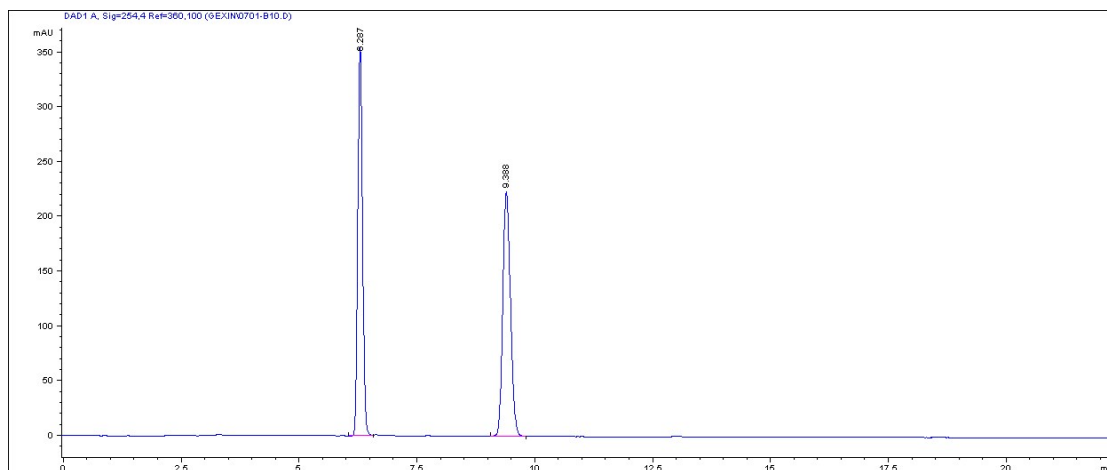

| Ret. Time [min] | Height [mAu] | Area [mAU*s] | Rel. Area [%] |
|-----------------|--------------|--------------|---------------|
| 6.287           | 356.2        | 2505.1       | 49.7          |
| 9.388           | 223.6        | 2533.7       | 50.3          |

Optically active (25% ee)

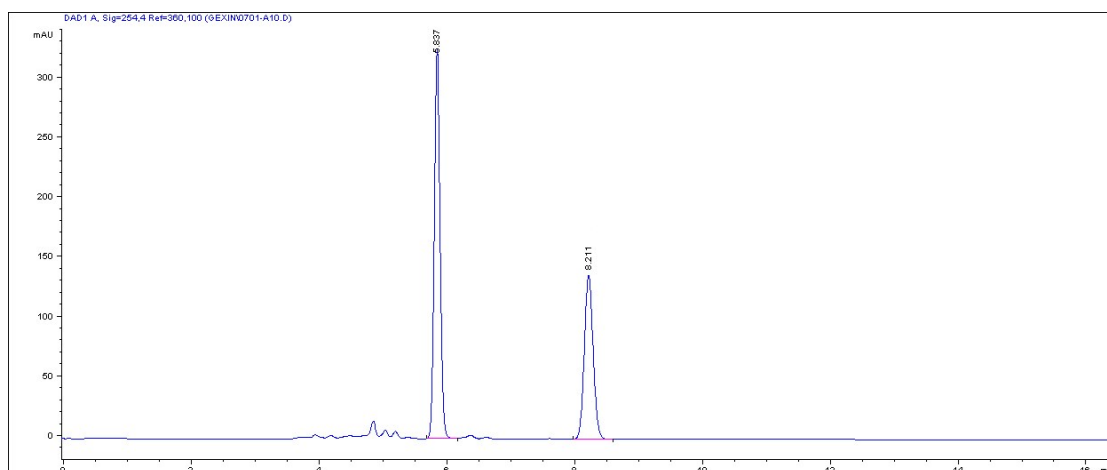

| Ret. Time [min] | Height [mAu] | Area [mAU*s] | Rel. Area [%] |
|-----------------|--------------|--------------|---------------|
| 5.837           | 327          | 2086.4       | 62.6          |
| 8.211           | 136.4        | 1264.5       | 37.4          |
